# Supplementary material for: trans-Bis(alkylphosphine) platinum(ii)-alkynyl complexes showing broadband visible light absorption and long-lived triplet excited states
Source: Royal Society of Chemistry journal article supplement (doi:10.1039/c4tc01675k), 2014-01-01
Supplement: c4tc01675k1.pdf [file c4tc01675k1.pdf]

Electronic Supplementary Information for:

## **Trans bis(alkylphosphine) platinum(II)-alkynyl complexes showing broadband visible light absorption and long-lived triplet excited states**

*Huiru Jia,<sup>a</sup> Betül Küçüköz,<sup>b</sup> Yongheng Xing,<sup>c</sup> Poulomi Majumdar,<sup>a</sup> Caishun Zhang,<sup>a</sup>  
Ahmet Karatay,<sup>b</sup> Gul Yaglioglu,<sup>b</sup> Ayhan Elmali,<sup>b</sup> Jianzhang Zhao<sup>a,\*</sup> and Mustafa  
Hayvali<sup>d,\*</sup>*

<sup>a</sup> State Key Laboratory of Fine Chemicals, School of Chemical Engineering, Dalian University of Technology, E-208 West Campus, 2 Ling Gong Rd., Dalian 116024, P. R. China;  
E-mail: zhaojzh@dlut.edu.cn Web: <http://finechem.dlut.edu.cn/photochem>;

<sup>b</sup> Department of Engineering Physics, Faculty of Engineering, Ankara University, 06100 Beşevler, Ankara, Turkey;

<sup>c</sup> School of Chemistry and Chemical Engineering, Liaoning Normal University, 850 Huanghe Rd., Dalian 116029, P. R. China;

<sup>d</sup> Department of Chemistry, Faculty of Science, Ankara University, 06100 Beşevler, Ankara, Turkey.  
E-mail: hayvali@science.ankara.edu.tr

### **Table of Contents**

|                                                                         |     |
|-------------------------------------------------------------------------|-----|
| 1.0 General Information.....                                            | S2  |
| 2.0 NMR and HRMS spectra.....                                           | S3  |
| 3.0 Crystallographic data.....                                          | S12 |
| 4.0 Transient absorption details.....                                   | S13 |
| 5.0 TTA upconversion details.....                                       | S15 |
| 6.0 Time-resolved emission spectra of <b>Pt-a</b> and <b>Pt-b</b> ..... | S16 |
| 7.0 DFT calculations.....                                               | S17 |

## 1.0 General.

All the chemicals used in synthesis are analytical pure and were used as received. Solvents were dried and distilled before used for synthesis.

Fluorescence lifetimes were measured on a OB920 luminescence lifetime spectrometer (TCSPC, Edinburgh, UK). The nanosecond time-resolved transient absorption spectra were detected by LP920 Edinburgh analytical instruments (Edinburgh Instruments, U.K.) and recorded on a Tektronix TDS 3012B oscilloscope. The lifetime values (by monitoring the decay trace of the transients) were obtained with the LP900 software. All samples in flash photolysis experiments were deaerated with argon for ca. 15 min before measurement and the gas flow is kept during the measurement.

The free energy changes of the electron transfer process (charge separation, CS), can be calculated with the Weller equation (eq. 1 and eq. 2 )

$$\Delta G^0_{CS} = e[E_{OX} - E_{RED}] - E_{00} + \Delta G_S \quad (\text{Eq. 1})$$

$$\Delta G_S = -\frac{e^2}{4\pi\epsilon_S\epsilon_0 R_{CC}} - \frac{e^2}{8\pi\epsilon_0} \left( \frac{1}{R_D} + \frac{1}{R_A} \right) \left( \frac{1}{\epsilon_{REF}} - \frac{1}{\epsilon_S} \right) \quad (\text{Eq. 2})$$

Where  $\Delta G_S$  is the static Coulombic energy, which is described by eq. 2. Where  $\Delta G_S$  is the static Coulombic energy, which is described by eq. 2.  $e$  = electronic charge,  $E_{OX}$  = half-wave potential for one-electron oxidation of the electron-donor unit,  $E_{RED}$  = half-wave potential for one-electron reduction of the electron-acceptor unit; note herein the anodic and cathodic peak potentials were used because in some cases the oxidation is irreversible therefore the formal potential  $E_{1/2}$  cannot be derived;  $E_{00}$  = energy level approximated with the fluorescence emission wavelength (for the singlet excited state), or the  $T_1$  state energy level of Bodipy.  $\epsilon_S$  = static dielectric constant of the solvent,  $R_{CC}$  center-to-center separation distance determined by DFT optimization of the geometry,  $R_D$  is the radius of the BODIPY-based donor,  $R_A$  is the radius of the electron acceptor,  $\epsilon_{REF}$  is the static dielectric constant of the solvent used for the electrochemical studies,  $\epsilon_0$  permittivity of free space. The solvents used in the calculation of free energy of the electron transfer is  $\text{CH}_2\text{Cl}_2$  ( $\epsilon = 9.1$ ).

## 2.0 NMR and HRMS spectra

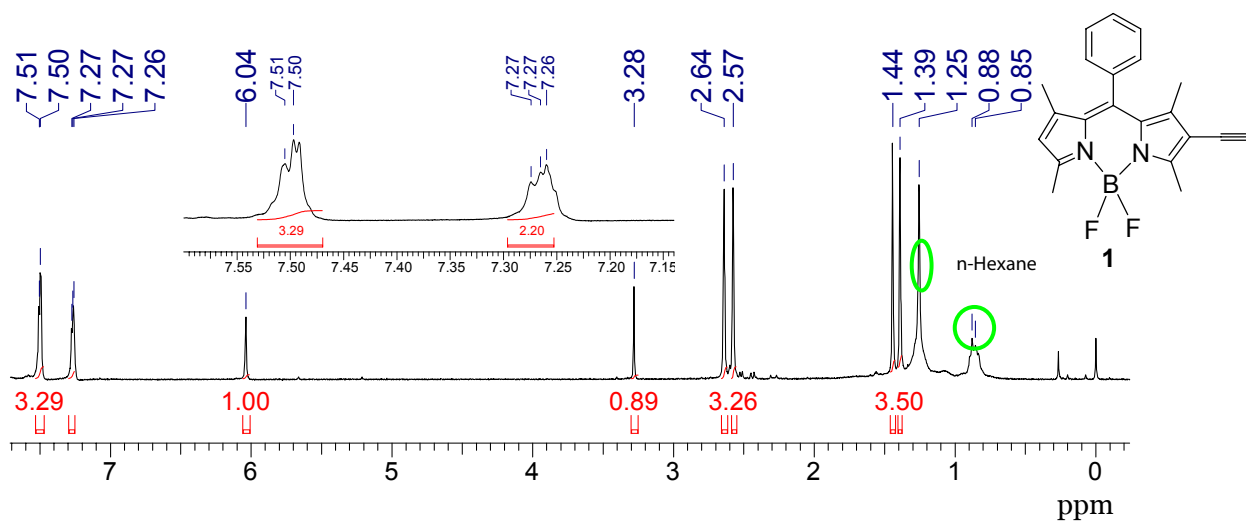

**Fig. S1**  $^1\text{H}$  NMR of compound **1** (400 MHz,  $\text{CDCl}_3$ ).

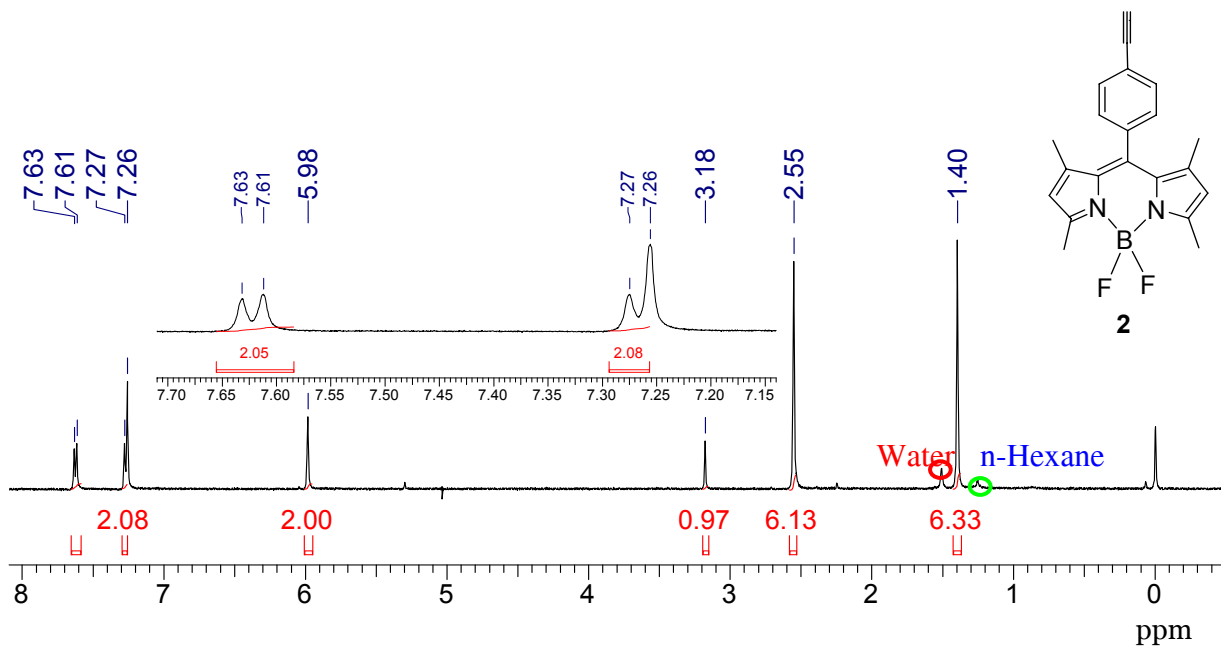

**Fig. S2**  $^1\text{H}$  NMR of compound **2** (400 MHz,  $\text{CDCl}_3$ ).

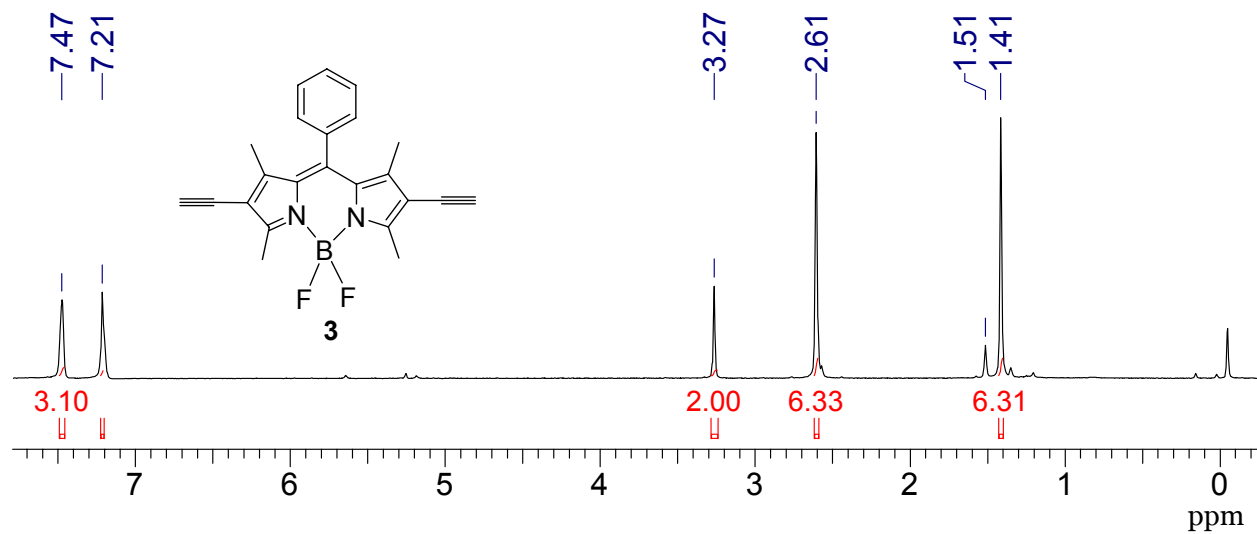

**Fig. S3** <sup>1</sup>H NMR of compound **3** (400 MHz, CDCl<sub>3</sub>).

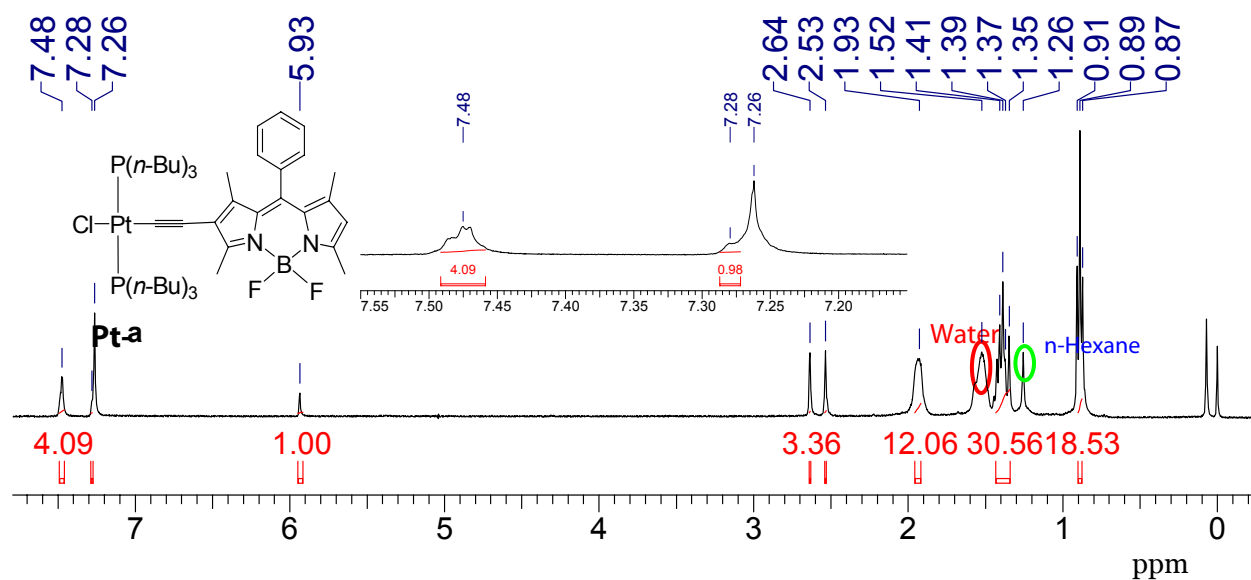

**Fig. S4** <sup>1</sup>H NMR (400 MHz, CDCl<sub>3</sub>) of complex **Pt-a**.

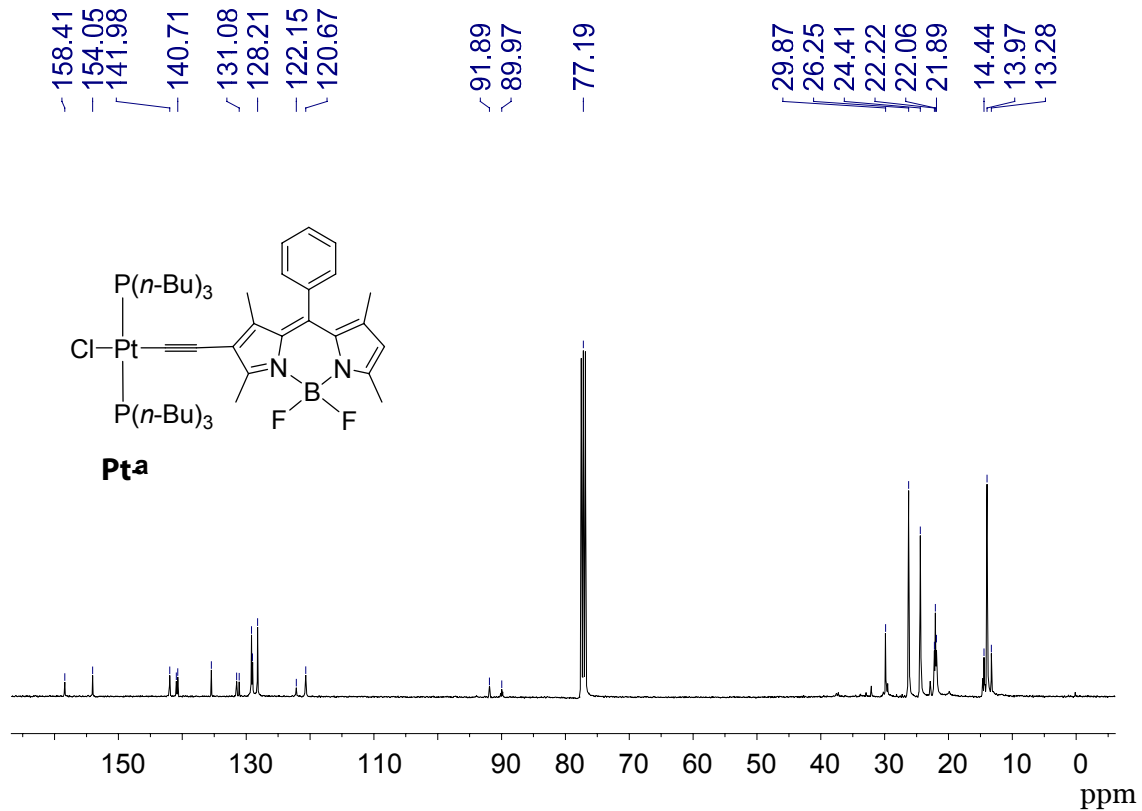

**Fig. S5** <sup>13</sup>C NMR (100 MHz, CDCl<sub>3</sub>) of **Pt-a**.

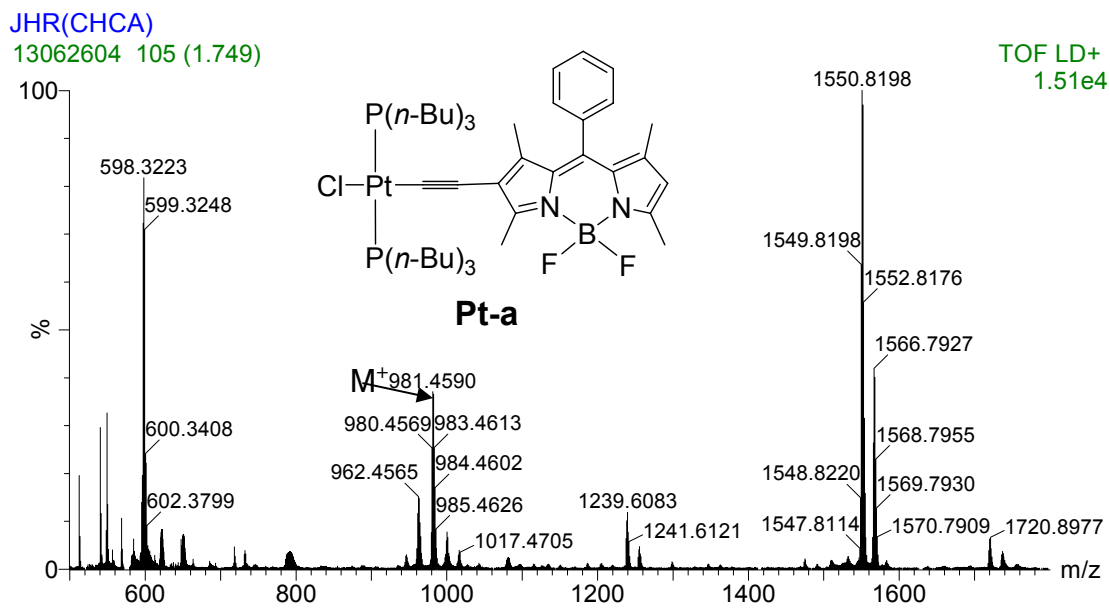

**Fig. S6** MALDI-HRMS of **Pt-a**.

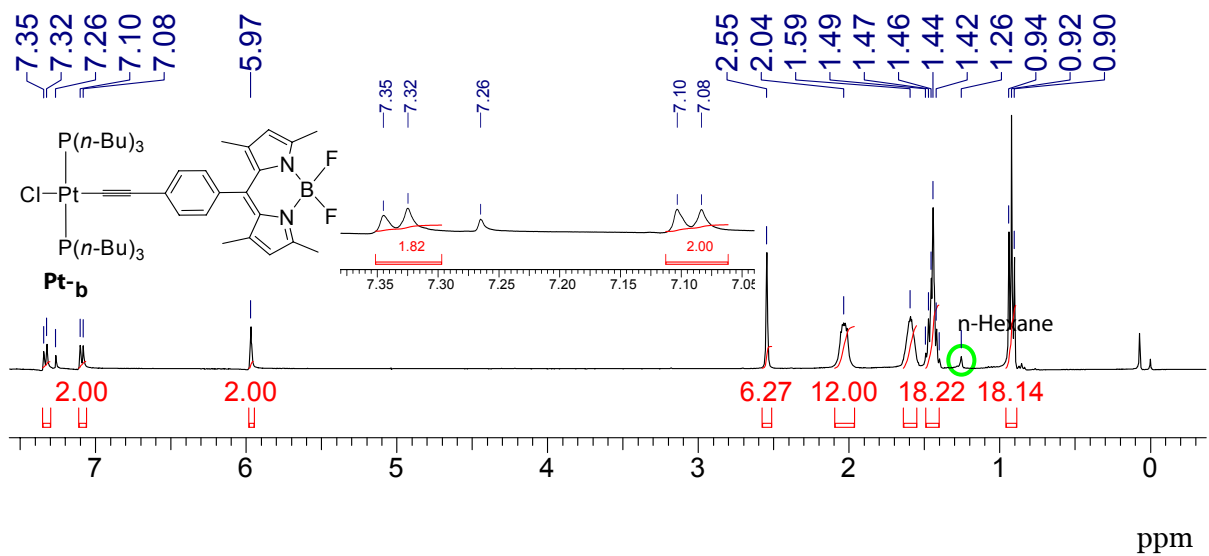

**Fig. S7**  $^1\text{H}$  NMR (400 MHz,  $\text{CDCl}_3$ ) of complex **Pt-b**.

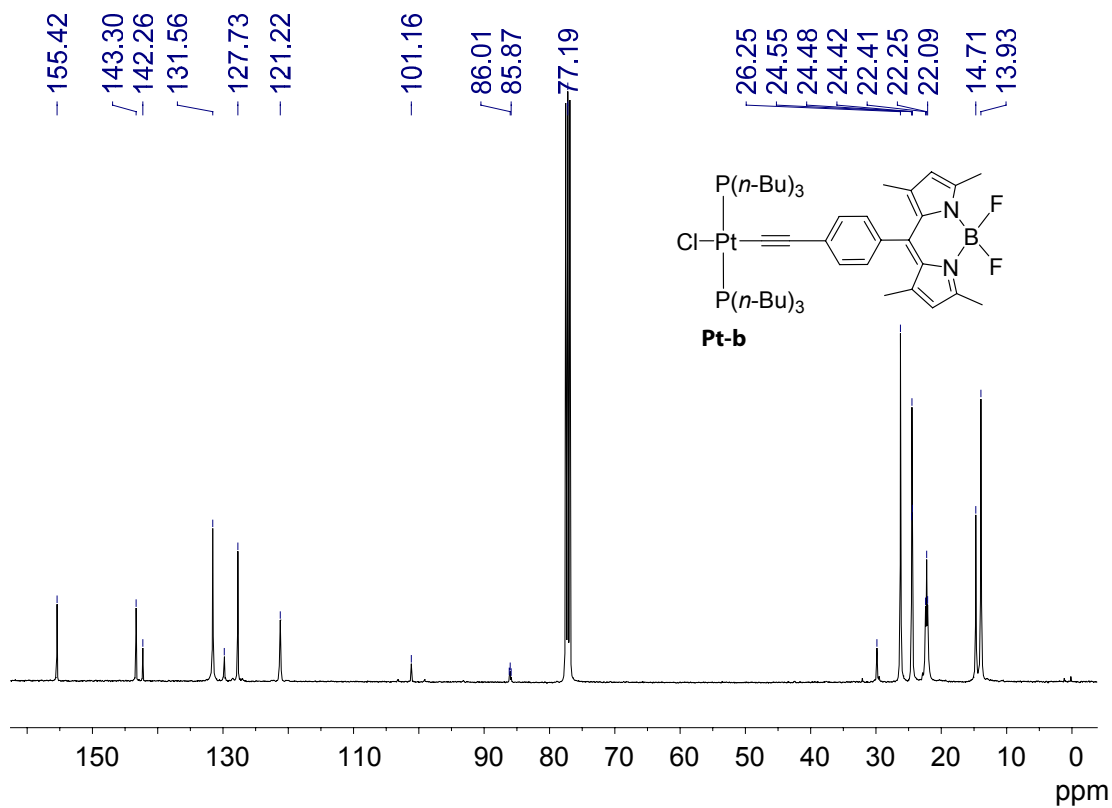

**Fig. S8**  $^{13}\text{C}$  NMR (100 MHz,  $\text{CDCl}_3$ ) of **Pt-b**.

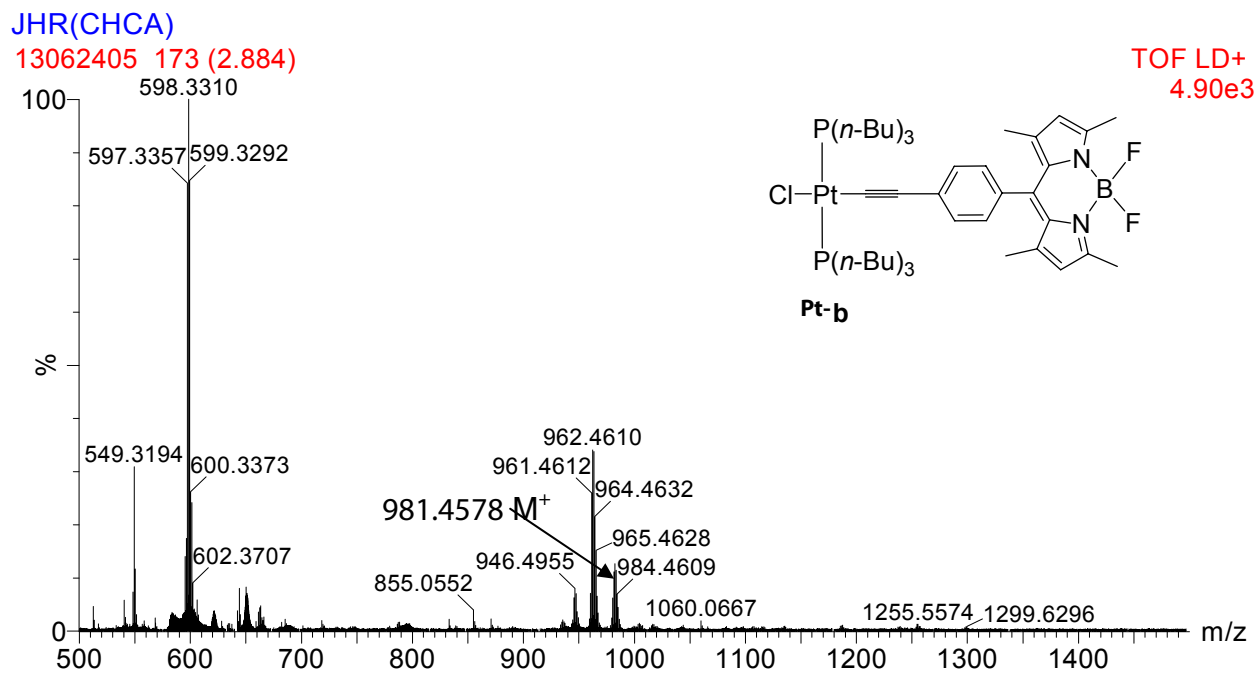

**Fig. S9** MALDI-HRMS of Pt-b.

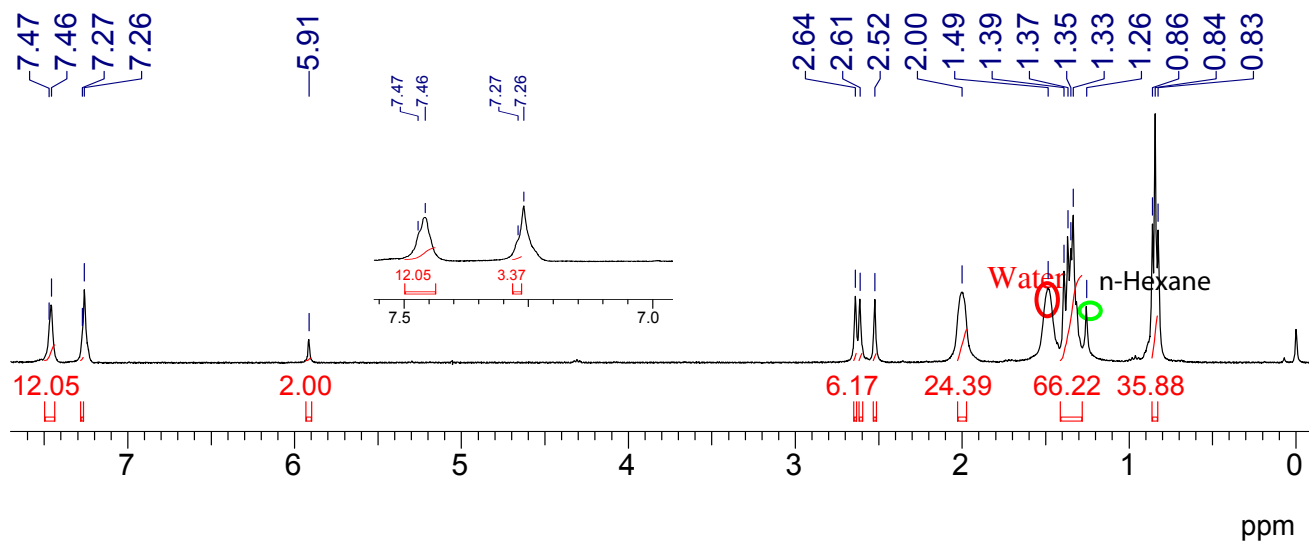

**Fig. S10**  $^1\text{H}$  NMR (400 MHz,  $\text{CDCl}_3$ ) of Pt-1.

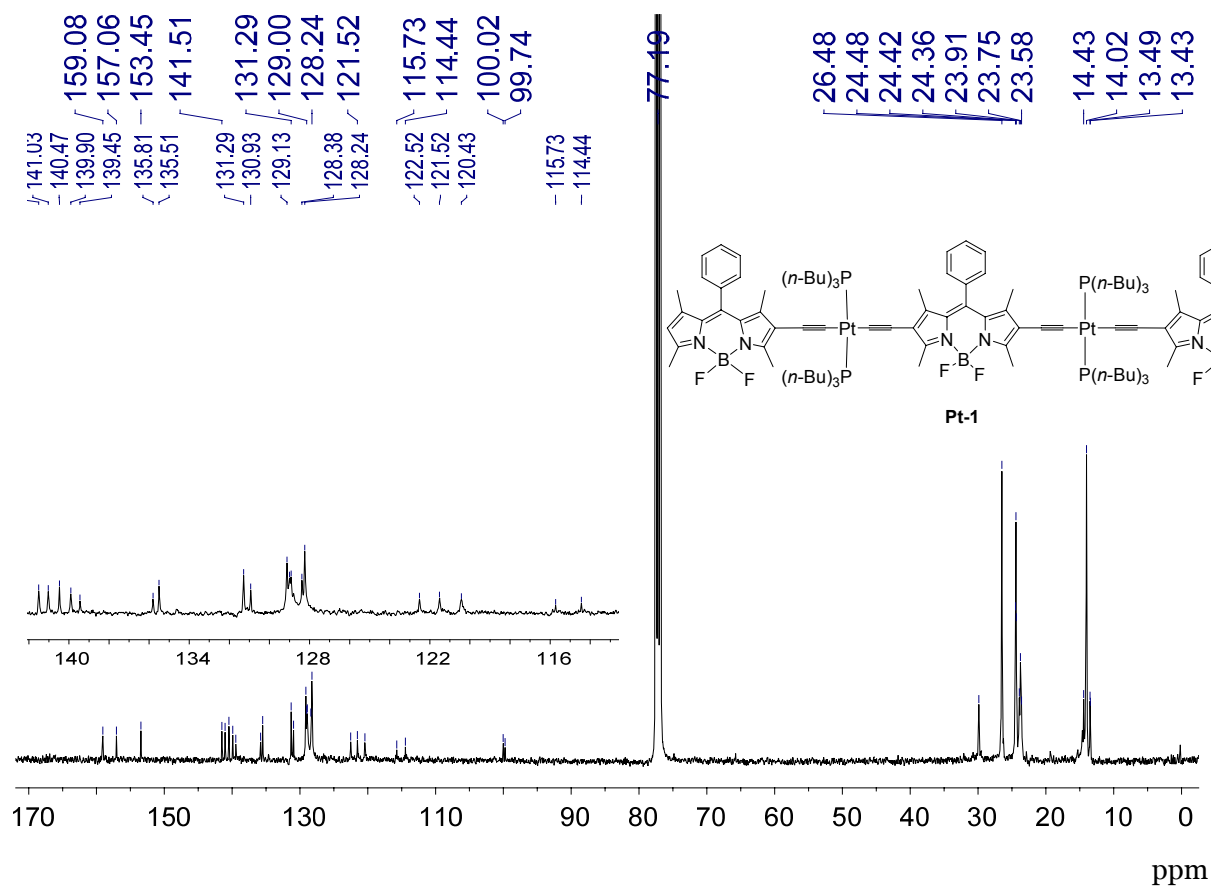

**Fig. S11** <sup>13</sup>C NMR (100 MHz, CDCl<sub>3</sub>) of **Pt-1**.

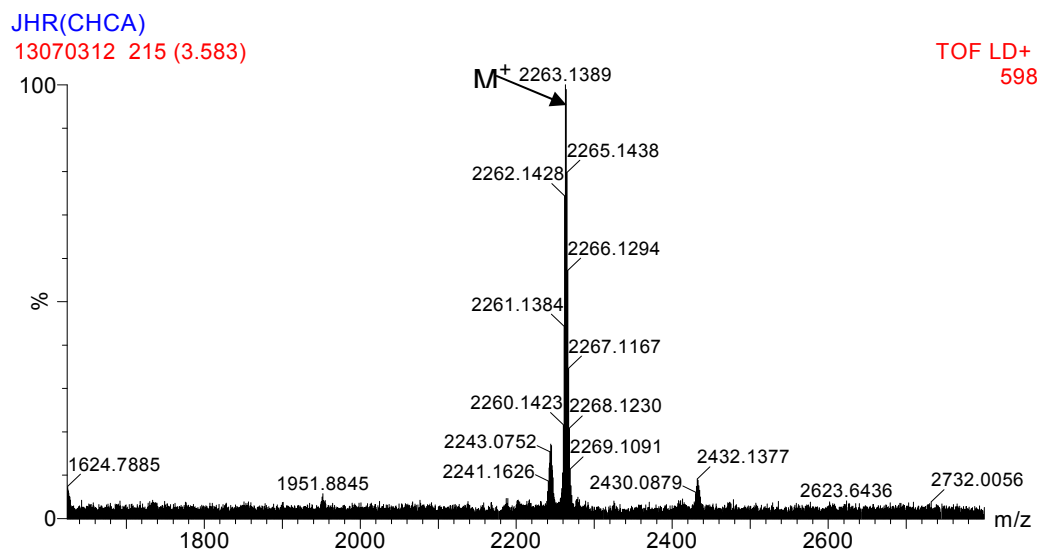

**Fig. S12** MALDI-HRMS of **Pt-1**.



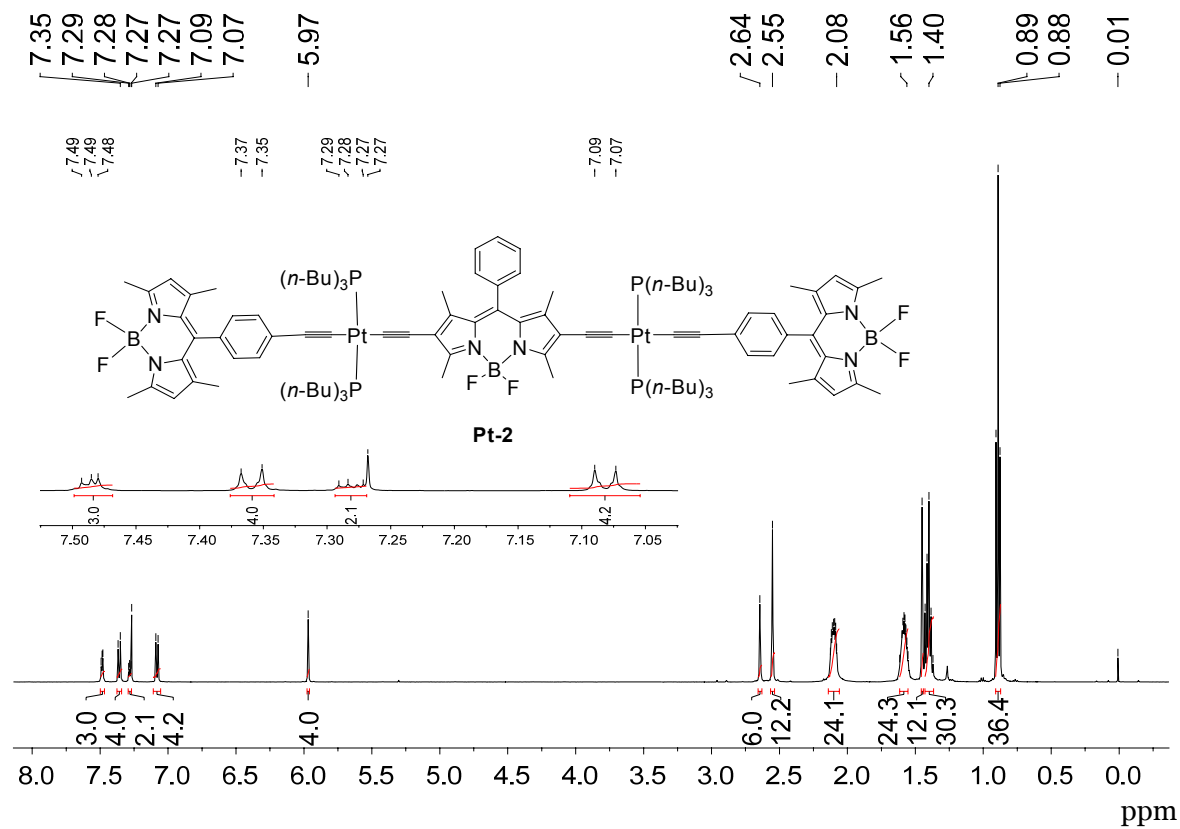

**Fig. S13**  $^1\text{H}$  NMR (500 MHz,  $\text{CDCl}_3$ ) of **Pt-2**.

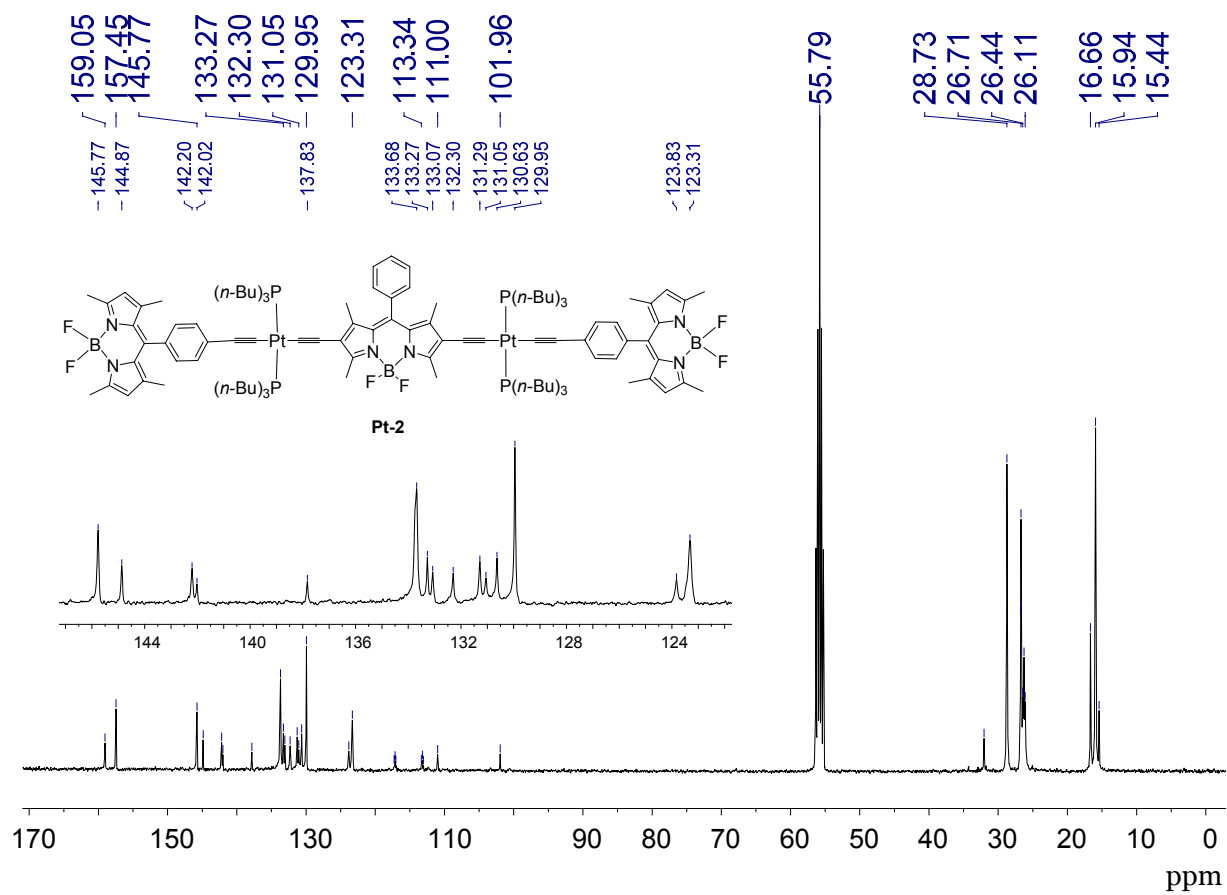

**Fig. S14** <sup>13</sup>C NMR (100 MHz, CDCl<sub>3</sub>) of **Pt-2**.

JHR(CHCA)  
13070103 98 (1.633)

TOF LD+  
731

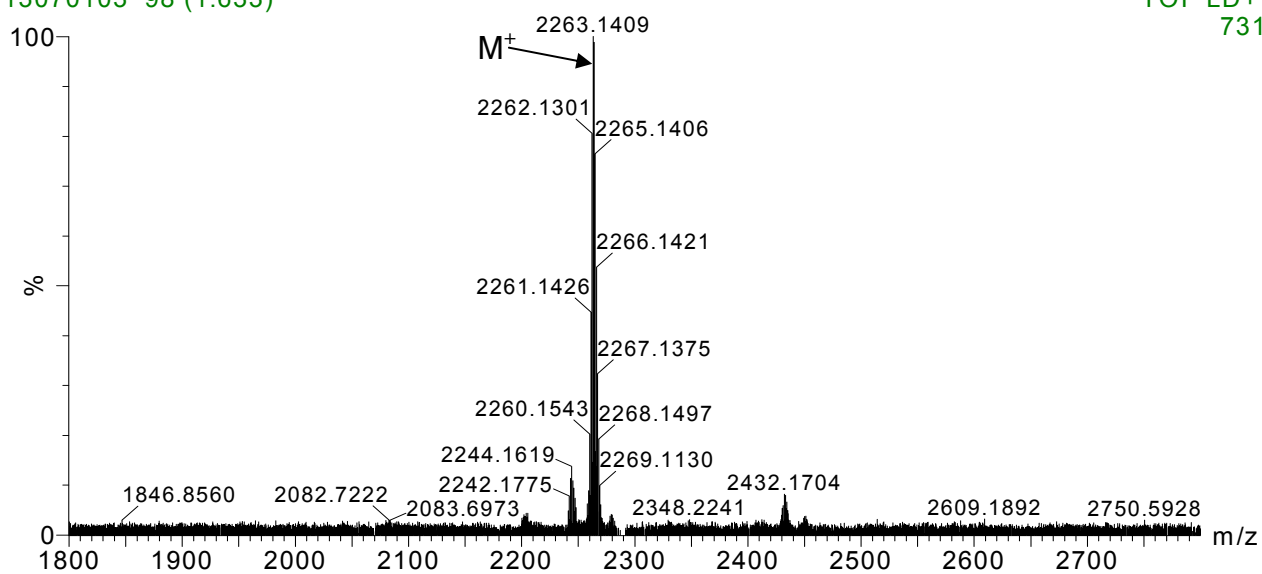

Fig. S 15 MALDI-HRMS of Pt-2.

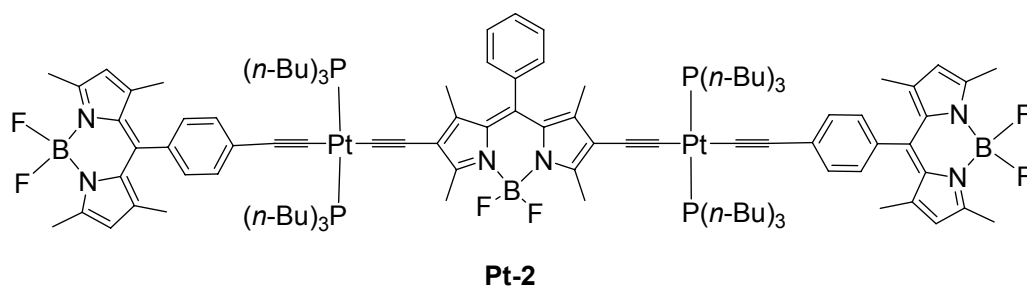

### 3.0 Crystallographic data.

**Table S1.** Summary of unit cell, space group, data collection and structure refinement parameters for **Pt-b**.

| Compound               | <b>Pt-b</b>                                                                        |
|------------------------|------------------------------------------------------------------------------------|
| Empirical formula      | C <sub>45</sub> H <sub>72</sub> BClF <sub>2</sub> N <sub>2</sub> P <sub>2</sub> Pt |
| Formula weight         | 982.33                                                                             |
| Temperature (K)        | 173 K                                                                              |
| Wavelength (Å)         | 0.71073                                                                            |
| Volume                 | 4964.0(9)                                                                          |
| Space group            | P21/c                                                                              |
| <i>a</i> (Å)           | 10.0654(11)                                                                        |
| <i>b</i> (Å)           | 36.749(4)                                                                          |
| <i>c</i> (Å)           | 13.9440(15)                                                                        |
| (°)                    | 90                                                                                 |
| (°)                    | 105.757(2)                                                                         |
| (°)                    | 90                                                                                 |
| Dx, g cm <sup>-3</sup> | 1.314                                                                              |
|                        | 4                                                                                  |
| Mu (mm <sup>-1</sup> ) | 2.982                                                                              |
| Data completeness      | 0.994                                                                              |
| Theta(max)             | 27.610                                                                             |
| R(reflections)         | 0.0635( 6050)                                                                      |
| wR2(reflections)       | 0.1551( 11457)                                                                     |

#### 4.0 Nanosecond and Femtosecond Time-resolved Transient difference absorption spectra

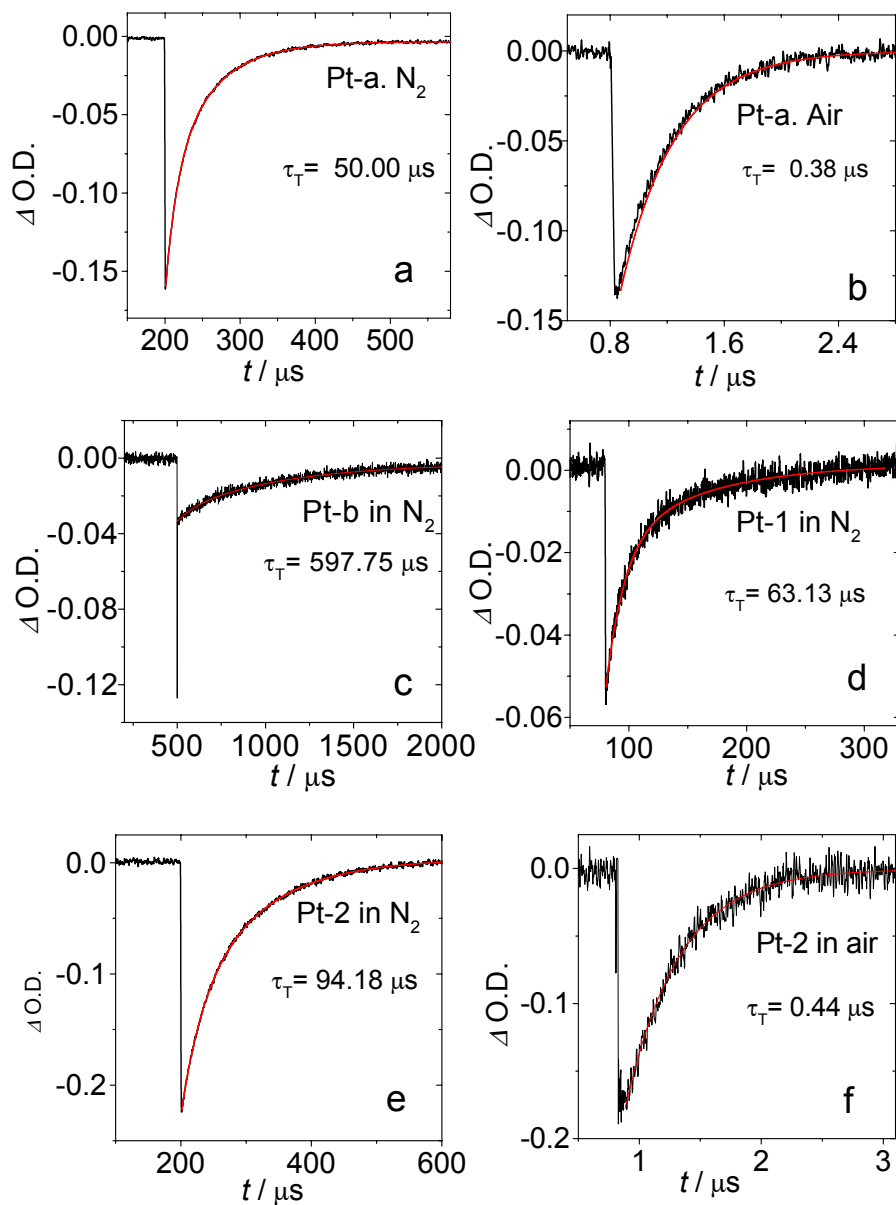

**Fig. S16** Triplet excited state decay traces of (a, b) **Pt-a** (584 nm); (c) **Pt-b** (504 nm), (d) **Pt-1** (644 nm) and (e, f) **Pt-2** (640 nm) under different atmosphere (annotated in the figures).  $c = 1.0 \times 10^{-5} M$  in toluene at 20 °C.

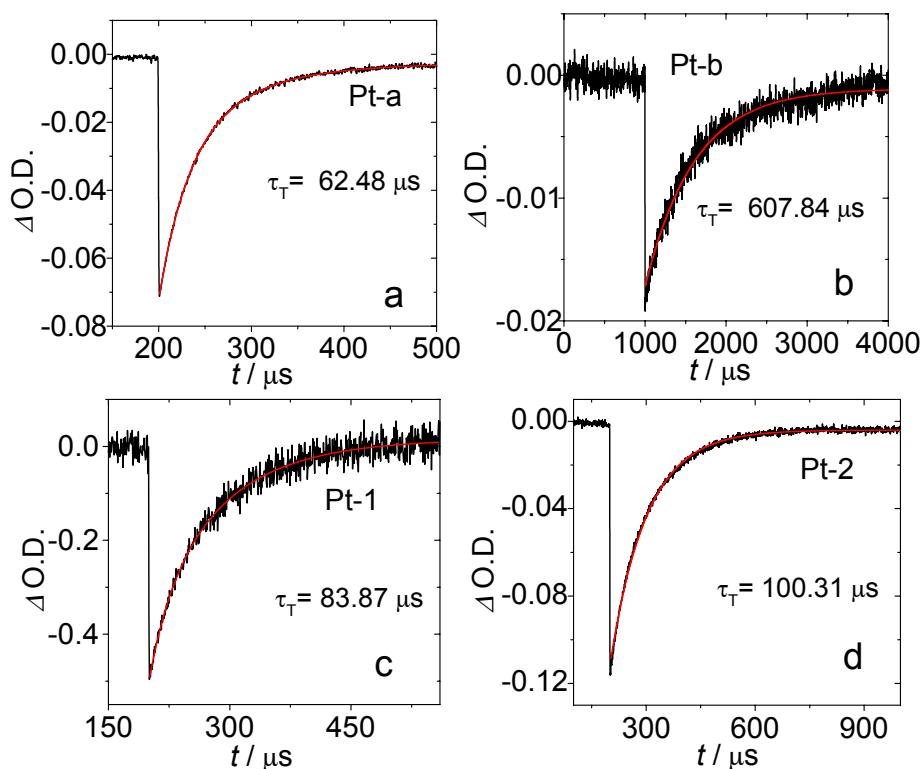

**Fig. S17** Triplet excited state decay traces of (a) **Pt-a** (584 nm), (b) **Pt-b** (504 nm), (c) **Pt-1** (644 nm), (d) **Pt-2** (640 nm).  $c = 5.0 \times 10^{-6} M$  in deaerated toluene at 20 °C.

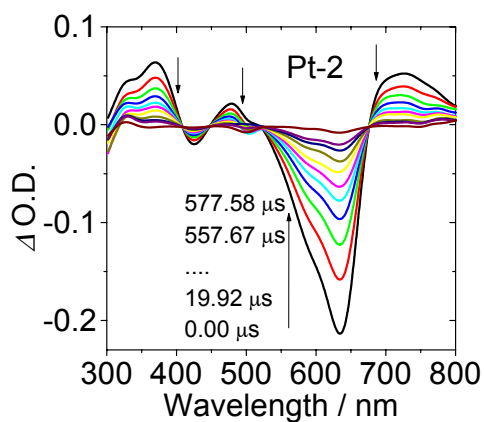

**Fig. S18** Nanosecond time-resolved transient difference absorption spectra of complex **Pt-2**, after nanosecond pulsed laser excitation ( $\lambda_{ex}=503$  nm).  $c = 1.0 \times 10^{-5} M$  in deaerated toluene, 20 °C.

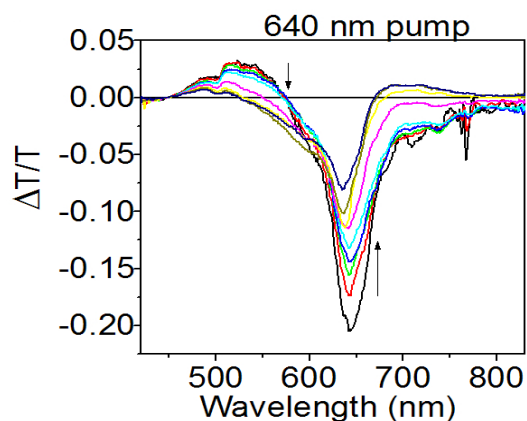

**Fig. S19** Picosecond ultrafast transient difference absorption spectra of **Pt-2** upon femtosecond pulsed laser excitation at 640 nm.  $c = 1.0 \times 10^{-5}$  M in toluene at 20 °C.

### 5.0 TTA upconversion details

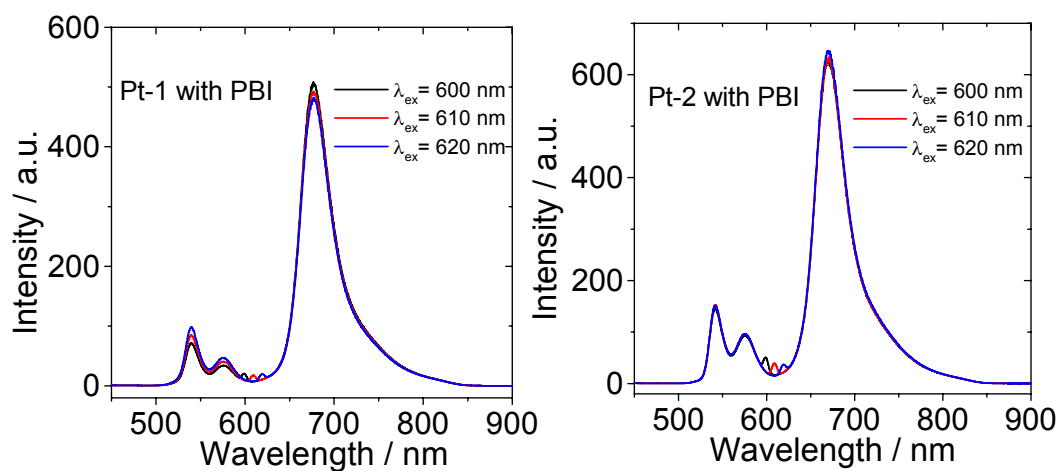

**Fig. S20** Upconversions with (a) **Pt-1** and (b) **Pt-2** upon excitation with the light of a spectrofluorometer (RF5301 PC, Shimadzu, Japan). Excitation wavelength  $\lambda_{\text{ex}} = 600$  nm, 610 nm, 620 nm,  $c$  [sensitizers] =  $1.0 \times 10^{-5}$  M, for **Pt-1**,  $c$  [PBI] =  $2.6 \times 10^{-5}$  M; for **Pt-2**,  $c$  [PBI] =  $4.0 \times 10^{-5}$  M, in deaerated toluene. 20 °C.

## 6.0 Time-resolved emission spectra (TRES) of Pt-a and Pt-b

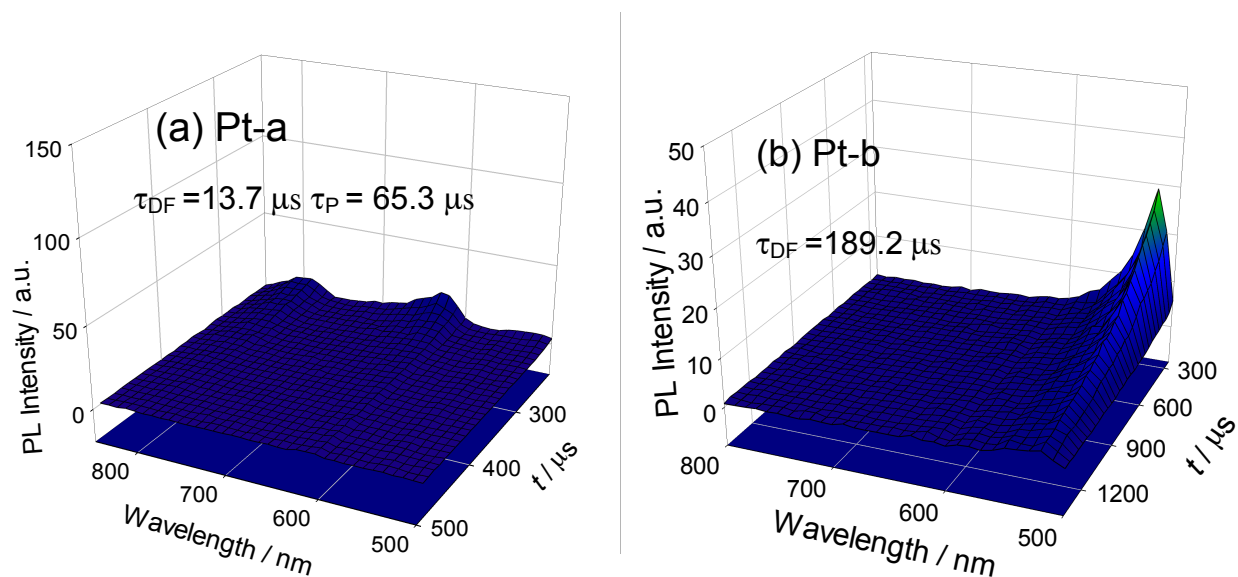

**Fig. S21** TRES of **Pt-a**, **Pt-b** alone. (a) **Pt-a**, the fluorescence and phosphorescence region was measured (500 nm – 850 nm),  $\tau_{DF} = 13.7 \mu\text{s}$  monitored at 627 nm;  $\tau_P = 65.3 \mu\text{s}$  monitored at 805 nm. (b) **Pt-b**, the fluorescence region was measured (500 nm – 800 nm),  $\tau_{DF} = 189.2 \mu\text{s}$  monitored at 516 nm.  $c = 1.0 \times 10^{-5} \text{ M}$ . In deaerated toluene. Excited with nanosecond pulsed OPO laser synchronized with spectrofluorometer (for **Pt-a**  $\lambda_{ex} = 560 \text{ nm}$ , for **Pt-b**,  $\lambda_{ex} = 503 \text{ nm}$ ), 25°C.



## 7.0 DFT calculations

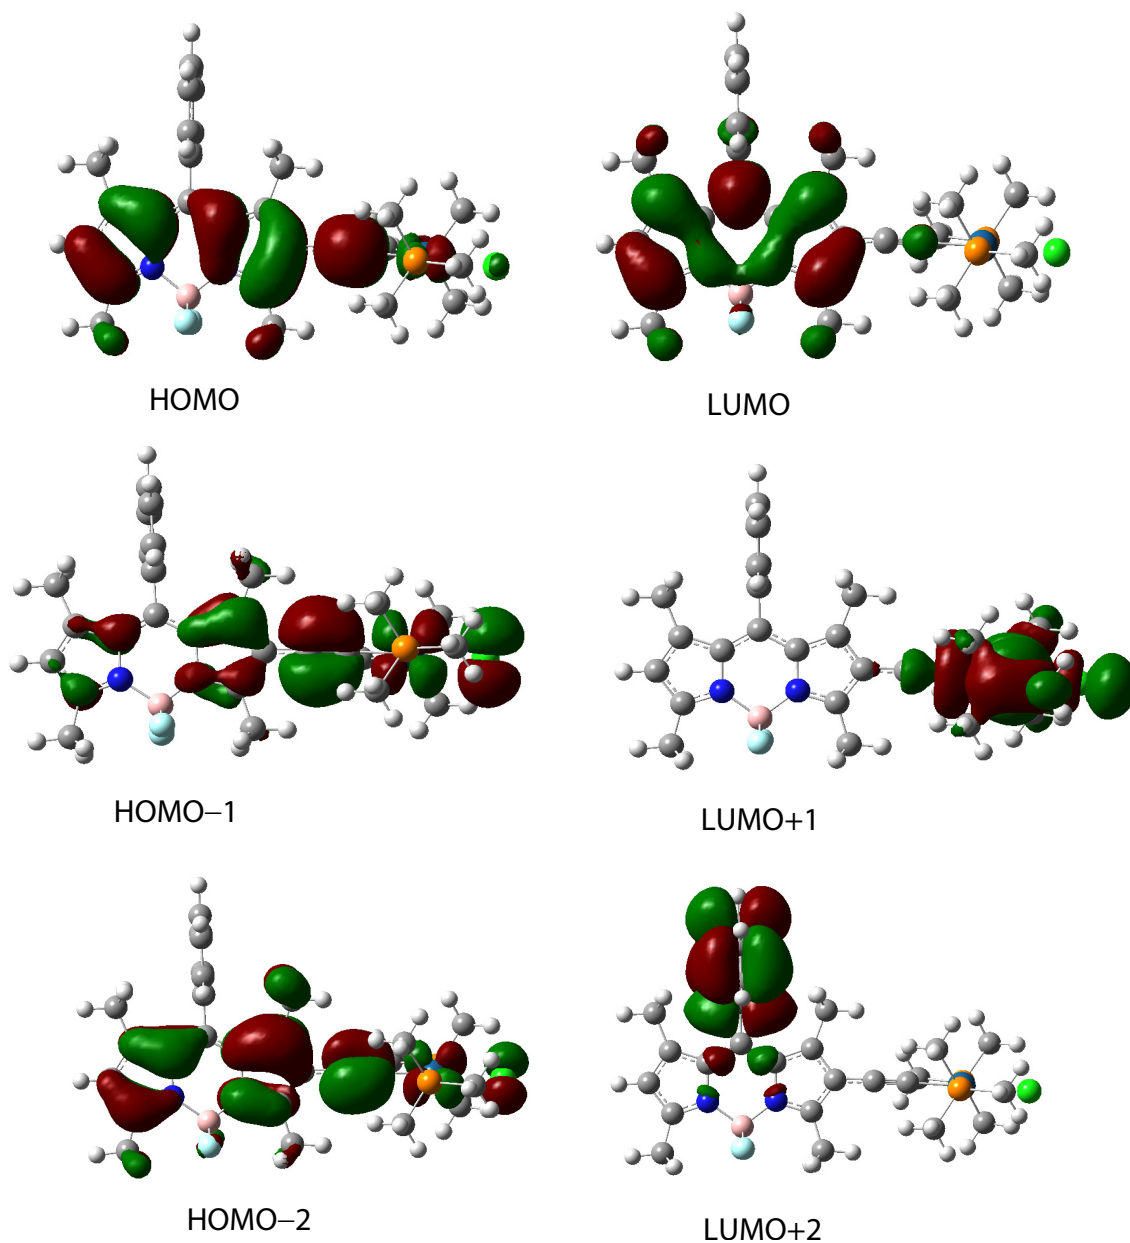

**Fig. S22** Electron density maps of the frontier molecular orbitals of complex **Pt-a** based on the optimized ground state geometry. The solvent toluene was considered in the calculations (PCM model). Calculated at the B3LYP/GENCP/LANL2DZ level with Gaussian 09W.

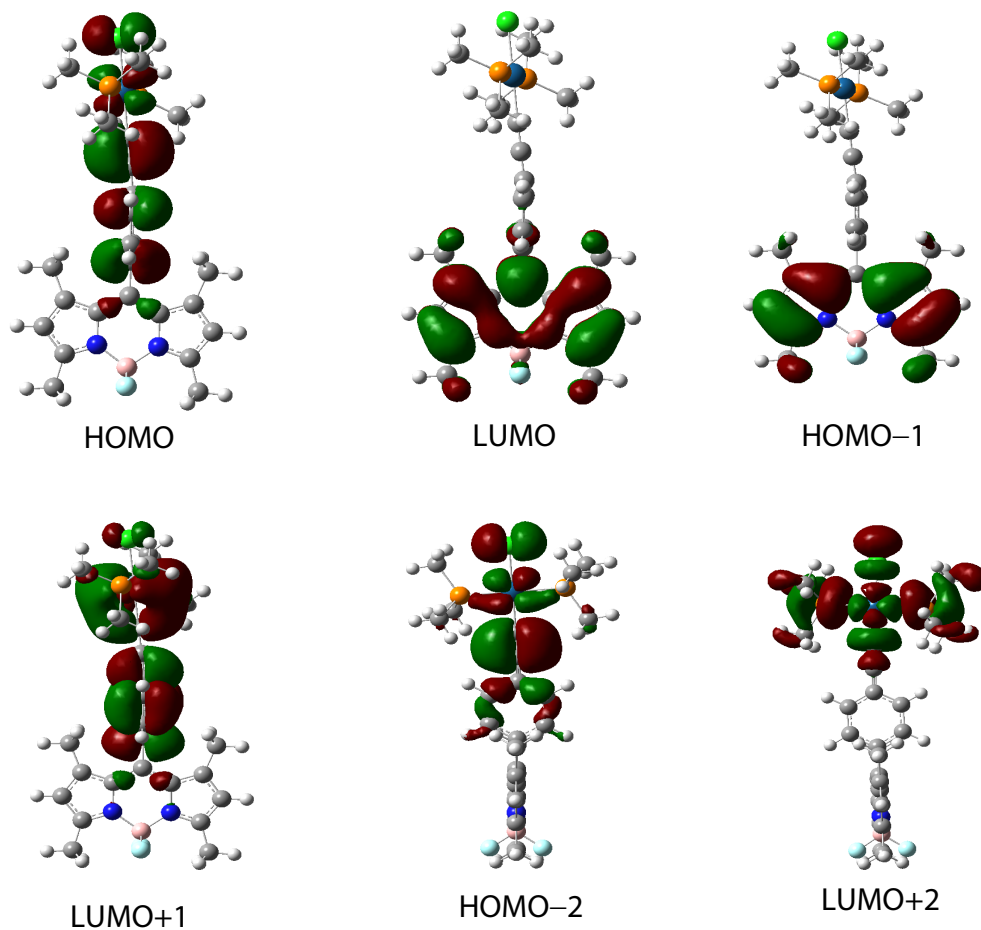

**Fig. S23** Electron density maps of the frontier molecular orbitals of complex **Pt-b** based on the optimized ground state geometry. The solvent toluene was considered in the calculations (PCM model). Calculated at the B3LYP/GENCP/LANL2DZ level with Gaussian 09W.

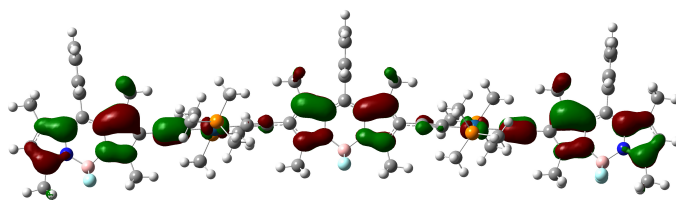

HOMO-6

**Fig. S24** Electron density maps of the frontier molecular orbitals of complex **Pt-1** based on the optimized ground state geometry. The solvent toluene was considered in the calculations (PCM model). Calculated at the B3LYP/GENCP/LANL2DZ level with Gaussian 09W.

**Table S2:** Excitation Energies (eV) and corresponding Oscillator Strengths ( $f$ ), main configurations and CI coefficients of the Low-lying Electronically Excited States of complex **Pt-a**, Calculated by TDDFT//B3LYP/LANL2DZ, based on the DFT//B3LYP/LANL2DZ Optimized Ground State Geometries

| TDDFT//B3LYP/LANL2DZ |                       |                             |        |                          |                 |           |
|----------------------|-----------------------|-----------------------------|--------|--------------------------|-----------------|-----------|
|                      | Electronic transition | Energy [eV/nm] <sup>a</sup> | $f^b$  | Composition <sup>c</sup> | CI <sup>d</sup> | Character |
| Singlet              | $S_0 \rightarrow S_1$ | 2.36 / 525                  | 0.4575 | H $\rightarrow$ L        | 0.68350         | MLCT      |
|                      | $S_0 \rightarrow S_3$ | 3.06 / 405                  | 0.5386 | H-2 $\rightarrow$ L      | 0.6273          | MLCT      |
| Triplet              | $S_0 \rightarrow T_1$ | 1.42 / 867                  | 0.6677 | H $\rightarrow$ L        | 0.0000          | MLCT      |

<sup>a</sup> Only the selected low-lying excited states are presented. <sup>b</sup> Oscillator strengths. <sup>c</sup> Only the main configurations are presented. <sup>d</sup> The CI coefficients are in absolute values. <sup>e</sup> No spin-orbital coupling effect was considered, thus the  $f$  values are zero.

**Table S3:** Excitation Energies (eV) and corresponding Oscillator Strengths ( $f$ ), main configurations and CI coefficients of the Low-lying Electronically Excited States of complex **Pt-b**, Calculated by TDDFT//B3LYP/LANL2DZ, based on the DFT//B3LYP/LANL2DZ Optimized Ground State Geometries

| TDDFT//B3LYP/ LANL2DZ |                                |                             |                  |                          |                 |           |
|-----------------------|--------------------------------|-----------------------------|------------------|--------------------------|-----------------|-----------|
|                       | Electronic transition          | Energy [eV/nm] <sup>a</sup> | $f$ <sup>b</sup> | Composition <sup>c</sup> | CI <sup>d</sup> | Character |
| Singlet               | S <sub>0</sub> →S <sub>1</sub> | 2.26 / 548                  | 0.0009           | H →L                     | 0.70296         | MLCT      |
|                       | S <sub>0</sub> →S <sub>2</sub> | 2.80 / 442                  | 0.5662           | H-1 →L                   | 0.69631         | ILCT      |
|                       | S <sub>0</sub> →S <sub>6</sub> | 3.61 / 342                  | 1.0131           | H →L+1                   | 0.68115         | ILCT      |
| Triplet               | S <sub>0</sub> →T <sub>1</sub> | 1.53 / 809                  | 0.0000           | H →L                     | 0.71025         | MLCT      |

<sup>a</sup> Only the selected low-lying excited states are presented. <sup>b</sup>Oscillator strengths. <sup>c</sup> Only the main configurations are presented. <sup>d</sup>The CI coefficients are in absolute values. <sup>e</sup>No spin-orbital coupling effect was considered, thus the  $f$  values are zero.

### Optimized ground state geometry of Pt-a

|   |          |          |           |  |
|---|----------|----------|-----------|--|
| O | 1        |          |           |  |
| C | 2.75414  | 9.89495  | -11.42985 |  |
| P | 0.6833   | 10.54654 | -9.07646  |  |
| C | -0.0519  | 12.19226 | -8.75219  |  |
| H | -0.12324 | 12.3637  | -7.66857  |  |
| H | -1.04555 | 12.22832 | -9.19294  |  |
| H | 0.56765  | 12.96851 | -9.1959   |  |
| C | -0.33914 | 9.36561  | -8.11622  |  |
| H | 0.09851  | 8.37027  | -8.16805  |  |
| H | -1.33985 | 9.34057  | -8.5394   |  |
| H | -0.38963 | 9.68161  | -7.06425  |  |
| C | 2.30514  | 10.57203 | -8.21397  |  |
| H | 2.7684   | 9.5913   | -8.2715   |  |
| H | 2.96267  | 11.29724 | -8.68593  |  |
| H | 2.1551   | 10.84456 | -7.15856  |  |
| P | 0.77976  | 9.50729  | -13.70209 |  |
| C | 1.49523  | 7.84956  | -14.02661 |  |
| H | 1.56289  | 7.67708  | -15.11024 |  |
| H | 0.86678  | 7.08143  | -13.58163 |  |
| H | 2.48979  | 7.79964  | -13.58807 |  |
| C | -0.83586 | 9.50656  | -14.56902 |  |

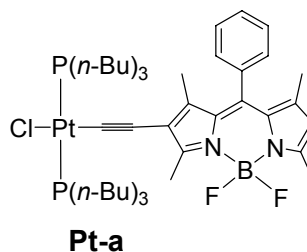

|    |          |          |           |
|----|----------|----------|-----------|
| H  | -1.28546 | 10.49304 | -14.50722 |
| H  | -1.50434 | 8.78746  | -14.10366 |
| H  | -0.68475 | 9.23816  | -15.62551 |
| C  | 1.82681  | 10.67343 | -14.65332 |
| H  | 1.40391  | 11.67467 | -14.60119 |
| H  | 2.82641  | 10.68305 | -14.2252  |
| H  | 1.87864  | 10.35888 | -15.70551 |
| C  | 3.97783  | 9.81435  | -11.44898 |
| C  | 6.47534  | 8.62071  | -11.32437 |
| C  | 6.36076  | 10.85273 | -11.74196 |
| C  | 5.57575  | 9.70911  | -11.47396 |
| C  | 7.72118  | 10.42777 | -11.75581 |
| C  | 8.92189  | 11.12188 | -11.98693 |
| C  | 10.16072 | 10.45817 | -11.95783 |
| C  | 11.51057 | 10.93135 | -12.14378 |
| C  | 11.50974 | 8.66708  | -11.78139 |
| N  | 7.73264  | 9.05479  | -11.42622 |
| N  | 10.22369 | 9.07113  | -11.71195 |
| B  | 9.00314  | 8.15373  | -11.43693 |
| F  | 9.09003  | 7.6044   | -10.14856 |
| F  | 8.96414  | 7.11441  | -12.38901 |
| C  | 5.77922  | 12.23493 | -11.96737 |
| H  | 6.12727  | 12.93793 | -11.21099 |
| H  | 6.0611   | 12.63398 | -12.94014 |
| H  | 4.69432  | 12.16509 | -11.91331 |
| C  | 11.92321 | 7.24347  | -11.6109  |
| H  | 13.00051 | 7.17069  | -11.72566 |
| H  | 11.6235  | 6.87576  | -10.63008 |
| H  | 11.42765 | 6.61771  | -12.35683 |
| C  | 12.00375 | 12.3204  | -12.43055 |
| H  | 11.71912 | 13.01613 | -11.64288 |
| H  | 13.08887 | 12.28581 | -12.49968 |
| H  | 11.60043 | 12.70309 | -13.36762 |
| C  | 6.1238   | 7.16668  | -11.17973 |
| H  | 6.55825  | 6.76893  | -10.26287 |
| H  | 5.04058  | 7.06117  | -11.15245 |
| H  | 6.53004  | 6.59247  | -12.01206 |
| C  | 8.88124  | 12.59161 | -12.26447 |
| C  | 8.7973   | 13.05195 | -13.58363 |
| C  | 8.92682  | 13.51227 | -11.21093 |
| C  | 8.75369  | 14.42488 | -13.84782 |
| C  | 8.89466  | 14.88556 | -11.47652 |
| H  | 9.00171  | 13.15848 | -10.18952 |
| H  | 8.68297  | 14.77324 | -14.87151 |
| H  | 8.93634  | 15.59247 | -10.6563  |
| C  | 8.80519  | 15.34421 | -12.79488 |
| H  | 8.77592  | 16.40823 | -12.99969 |
| H  | 8.75186  | 12.3405  | -14.39972 |
| Cl | -1.53797 | 10.17764 | -11.36275 |
| Pt | 0.73682  | 10.02781 | -11.39831 |
| C  | 12.30916 | 9.8027   | -12.00112 |
| H  | 13.37791 | 9.80736  | -12.05265 |

## Optimized ground state geometry of Pt-b

|     |           |          |          |
|-----|-----------|----------|----------|
| O 1 |           |          |          |
| C   | -10.13944 | 2.2579   | -2.16761 |
| Pt  | -8.1705   | 2.20045  | -1.72852 |
| P   | -7.85734  | 1.17746  | -3.82795 |
| C   | -8.43274  | 2.23467  | -5.21897 |
| H   | -8.33461  | 1.71101  | -6.17597 |
| H   | -7.83944  | 3.15349  | -5.24769 |
| H   | -9.47907  | 2.49952  | -5.0468  |
| C   | -6.13793  | 0.71952  | -4.28869 |
| H   | -5.73877  | 0.01402  | -3.5555  |
| H   | -5.50766  | 1.6124   | -4.27614 |
| H   | -6.11377  | 0.26632  | -5.28534 |
| C   | -8.81069  | -0.38412 | -4.01829 |
| H   | -8.45545  | -1.11958 | -3.29031 |
| H   | -9.86525  | -0.17641 | -3.81983 |
| H   | -8.69658  | -0.79212 | -5.02837 |
| P   | -8.50386  | 3.22556  | 0.36718  |
| C   | -10.22965 | 3.66808  | 0.81746  |
| H   | -10.26093 | 4.13495  | 1.80758  |
| H   | -10.84808 | 2.76697  | 0.81628  |
| H   | -10.63653 | 4.35645  | 0.07252  |
| C   | -7.92536  | 2.17969  | 1.76589  |
| H   | -6.87324  | 1.92966  | 1.60663  |
| H   | -8.50469  | 1.25189  | 1.79043  |
| H   | -8.04087  | 2.70336  | 2.72095  |
| C   | -7.56762  | 4.79779  | 0.55902  |
| H   | -6.50909  | 4.6035   | 0.36778  |
| H   | -7.92666  | 5.52799  | -0.17239 |
| H   | -7.69191  | 5.20683  | 1.5675   |
| C   | -11.33569 | 2.27842  | -2.44748 |
| C   | -19.4603  | 0.68528  | -4.45634 |
| C   | -17.30848 | 0.3463   | -3.72964 |
| C   | -17.48214 | 1.70445  | -4.12917 |
| C   | -16.57626 | 2.80179  | -4.14053 |
| C   | -17.02243 | 4.07318  | -4.59789 |
| C   | -16.34047 | 5.31997  | -4.72264 |
| C   | -18.52017 | 5.54122  | -5.41047 |
| N   | -18.8091  | 1.86774  | -4.56561 |
| N   | -18.34872 | 4.2528   | -5.02943 |
| B   | -19.45136 | 3.17392  | -5.07945 |
| F   | -19.91138 | 3.00747  | -6.39608 |
| F   | -20.53282 | 3.54065  | -4.26205 |
| C   | -16.08976 | -0.34026 | -3.18753 |
| H   | -15.25672 | -0.34269 | -3.90049 |
| H   | -15.7155  | 0.13046  | -2.27142 |
| H   | -16.33826 | -1.38094 | -2.95456 |
| C   | -19.81042 | 6.08054  | -5.9192  |
| H   | -19.70593 | 7.14276  | -6.15304 |
| H   | -20.13077 | 5.53887  | -6.81714 |
| H   | -20.60575 | 5.94729  | -5.17624 |
| C   | -14.91571 | 5.66497  | -4.40362 |

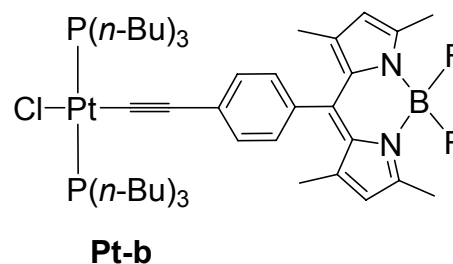

|    |           |          |          |
|----|-----------|----------|----------|
| H  | -14.20034 | 5.07223  | -4.98543 |
| H  | -14.74312 | 6.72191  | -4.63187 |
| H  | -14.67036 | 5.50267  | -3.34772 |
| C  | -20.88915 | 0.49949  | -4.82831 |
| H  | -21.05726 | 0.78306  | -5.87374 |
| H  | -21.18171 | -0.543   | -4.68168 |
| H  | -21.53497 | 1.14741  | -4.22327 |
| C  | -15.17005 | 2.62307  | -3.66582 |
| C  | -14.83236 | 2.85234  | -2.32255 |
| C  | -14.15483 | 2.22299  | -4.54898 |
| C  | -13.51984 | 2.68729  | -1.8737  |
| C  | -12.84102 | 2.05688  | -4.10396 |
| H  | -14.40184 | 2.0425   | -5.59195 |
| H  | -13.27901 | 2.8695   | -0.82949 |
| H  | -12.06893 | 1.74699  | -4.80359 |
| C  | -12.51996 | 2.28873  | -2.76429 |
| H  | -15.60882 | 3.16206  | -1.6279  |
| Cl | -5.94515  | 2.13276  | -1.23695 |
| C  | -18.54917 | -0.29282 | -3.93665 |
| H  | -18.7591  | -1.32294 | -3.73749 |
| C  | -17.28045 | 6.23986  | -5.23265 |
| H  | -17.08946 | 7.27117  | -5.44433 |

### Optimized ground state geometry of Pt-1

|     |           |          |          |
|-----|-----------|----------|----------|
| o 1 |           |          |          |
| C   | -4.84175  | -0.21047 | 0.04298  |
| C   | -6.06742  | -0.30014 | 0.0438   |
| C   | -10.09315 | -0.64532 | -0.00463 |
| Pt  | -8.0823   | -0.47139 | 0.02119  |
| P   | -7.91367  | -0.73491 | -2.31114 |
| C   | -7.16563  | 0.72549  | -3.14378 |
| H   | -7.03472  | 0.53954  | -4.21525 |
| H   | -6.19653  | 0.93284  | -2.68306 |
| H   | -7.81326  | 1.59646  | -3.00525 |
| C   | -6.83072  | -2.13883 | -2.80204 |
| H   | -7.26421  | -3.07663 | -2.44168 |
| H   | -5.85181  | -2.00473 | -2.33532 |
| H   | -6.72052  | -2.18669 | -3.89074 |
| C   | -9.47118  | -1.03012 | -3.24369 |
| H   | -9.94071  | -1.94945 | -2.8839  |
| H   | -10.1648  | -0.20417 | -3.06753 |
| H   | -9.26684  | -1.11831 | -4.31606 |
| P   | -8.23693  | -0.2035  | 2.35298  |
| C   | -9.01045  | -1.64573 | 3.19409  |
| H   | -9.13335  | -1.45355 | 4.26545  |
| H   | -8.37981  | -2.52919 | 3.05654  |
| H   | -9.98499  | -1.83797 | 2.73809  |
| C   | -6.66981  | 0.06542  | 3.2759   |
| H   | -6.17926  | 0.96842  | 2.9037   |
| H   | -5.99609  | -0.77795 | 3.10534  |
| H   | -6.86784  | 0.169    | 4.3481   |
| C   | -9.29151  | 1.22341  | 2.84126  |

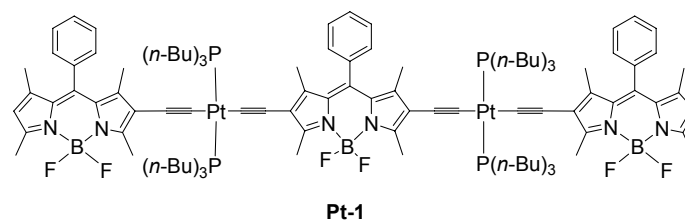

|    |           |          |          |
|----|-----------|----------|----------|
| H  | -8.8346   | 2.1519   | 2.48575  |
| H  | -10.27025 | 1.1134   | 2.36741  |
| H  | -9.40785  | 1.27185  | 3.92933  |
| C  | 2.50498   | -1.16181 | 0.07994  |
| C  | 2.52642   | 1.11513  | -0.026   |
| C  | 3.35594   | -0.02017 | 0.02007  |
| C  | 1.18014   | 0.63664  | 0.00358  |
| C  | -0.05579  | 1.30675  | -0.02259 |
| C  | -1.27019  | 0.59902  | 0.01349  |
| C  | -2.63097  | 1.03526  | -0.01272 |
| C  | -2.53794  | -1.23916 | 0.10889  |
| N  | 1.22129   | -0.7641  | 0.06844  |
| N  | -1.26738  | -0.8019  | 0.08723  |
| B  | -0.00853  | -1.71124 | 0.13074  |
| F  | -0.00503  | -2.57703 | -0.96736 |
| F  | 0.01292   | -2.44832 | 1.3184   |
| C  | 3.04102   | 2.5211   | -0.09226 |
| H  | 2.73316   | 3.03134  | -1.01198 |
| H  | 2.68237   | 3.13426  | 0.74152  |
| H  | 4.1346    | 2.50379  | -0.05952 |
| C  | -2.90376  | -2.68317 | 0.19032  |
| H  | -3.99068  | -2.78968 | 0.21218  |
| H  | -2.50084  | -3.23385 | -0.66677 |
| H  | -2.47502  | -3.13974 | 1.08902  |
| C  | -3.19024  | 2.42344  | -0.09173 |
| H  | -2.87394  | 2.94557  | -1.00156 |
| H  | -4.28313  | 2.36935  | -0.09007 |
| H  | -2.87563  | 3.04635  | 0.75282  |
| C  | 2.91577   | -2.59433 | 0.1494   |
| H  | 2.47405   | -3.16365 | -0.67515 |
| H  | 4.00449   | -2.67046 | 0.10354  |
| H  | 2.55884   | -3.05396 | 1.07795  |
| C  | -0.07931  | 2.80084  | -0.08271 |
| C  | -0.10247  | 3.55418  | 1.09928  |
| C  | -0.07883  | 3.4652   | -1.31689 |
| C  | -0.1243   | 4.94943  | 1.04732  |
| C  | -0.10157  | 4.86077  | -1.36733 |
| H  | -0.06112  | 2.88638  | -2.23629 |
| H  | -0.14158  | 5.52235  | 1.97044  |
| H  | -0.10156  | 5.36455  | -2.33007 |
| C  | -0.12411  | 5.60574  | -0.18595 |
| H  | -0.14147  | 6.69134  | -0.22601 |
| H  | -0.10294  | 3.04413  | 2.05869  |
| C  | -3.42424  | -0.12489 | 0.04585  |
| C  | 4.77544   | -0.06087 | 0.0108   |
| C  | 6.00339   | -0.11111 | 0.00689  |
| C  | 10.04012  | -0.27809 | -0.04907 |
| Pt | 8.02361   | -0.19465 | -0.02176 |
| P  | 8.14459   | -0.629   | 2.28758  |
| C  | 9.08967   | 0.6589   | 3.20108  |
| H  | 9.18674   | 0.39844  | 4.26058  |
| H  | 8.57485   | 1.62017  | 3.11146  |
| H  | 10.08069  | 0.75114  | 2.74937  |
| C  | 6.55655   | -0.75392 | 3.20443  |



|   |           |          |          |
|---|-----------|----------|----------|
| H | 5.9563    | -1.56511 | 2.78488  |
| H | 5.9948    | 0.17595  | 3.08594  |
| H | 6.7386    | -0.94253 | 4.26776  |
| C | 9.0193    | -2.19859 | 2.68421  |
| H | 8.45792   | -3.04229 | 2.27171  |
| H | 10.00769  | -2.1762  | 2.21809  |
| H | 9.122     | -2.32878 | 3.76693  |
| P | 7.8886    | 0.23498  | -2.33151 |
| C | 9.46893   | 0.32868  | -3.2667  |
| H | 9.27928   | 0.52357  | -4.32756 |
| H | 10.01035  | -0.61464 | -3.15847 |
| H | 10.09119  | 1.12592  | -2.85216 |
| C | 6.9106    | -1.03652 | -3.23244 |
| H | 5.921     | -1.10411 | -2.77364 |
| H | 7.40499   | -2.00831 | -3.14095 |
| H | 6.81258   | -0.77899 | -4.29254 |
| C | 7.04136   | 1.82019  | -2.72531 |
| H | 6.05463   | 1.81526  | -2.25544 |
| H | 7.61976   | 2.65421  | -2.31663 |
| H | 6.93571   | 1.95048  | -3.80773 |
| C | -11.31824 | -0.7417  | -0.01019 |
| C | 11.3471   | -0.3366  | -0.11598 |
| C | 18.70079  | -2.32427 | 0.05264  |
| C | 19.02852  | -0.01206 | 0.08421  |
| C | 17.58826  | -0.31462 | 0.03727  |
| C | 16.42317  | 0.54182  | 0.01393  |
| C | 15.09245  | -0.01064 | -0.02494 |
| C | 13.76647  | 0.62232  | -0.05308 |
| C | 13.55036  | -1.70901 | -0.07817 |
| N | 17.44023  | -1.7456  | 0.01967  |
| N | 14.9024   | -1.43986 | -0.04227 |
| B | 16.06054  | -2.54105 | -0.03148 |
| F | 16.01107  | -3.34259 | -1.22582 |
| F | 15.94906  | -3.38558 | 1.12709  |
| C | 19.77205  | 1.35307  | 0.12051  |
| H | 19.54662  | 1.97615  | -0.79041 |
| H | 19.47141  | 1.96831  | 1.01477  |
| H | 20.88542  | 1.19357  | 0.16604  |
| C | 12.99463  | -3.13432 | -0.10873 |
| H | 11.87331  | -3.09356 | -0.1638  |
| H | 13.39322  | -3.70331 | -0.99527 |
| H | 13.30456  | -3.70712 | 0.81076  |
| C | 13.40834  | 2.11744  | -0.05075 |
| H | 13.85929  | 2.67123  | -0.92199 |
| H | 12.28876  | 2.21535  | -0.10885 |
| H | 13.75931  | 2.64288  | 0.88248  |
| C | 18.9432   | -3.84909 | 0.04706  |
| H | 18.47036  | -4.31635 | -0.86236 |
| H | 20.04162  | -4.08732 | 0.05374  |
| H | 18.45909  | -4.32502 | 0.94611  |
| C | 16.63093  | 2.06879  | 0.02933  |
| C | 16.66393  | 2.78773  | 1.2782   |
| C | 16.77973  | 2.7965   | -1.2061  |
| C | 16.84337  | 4.21253  | 1.29029  |

|   |           |          |          |
|---|-----------|----------|----------|
| C | 16.95831  | 4.22142  | -1.19228 |
| H | 16.75481  | 2.24362  | -2.17665 |
| H | 16.86762  | 4.75878  | 2.26464  |
| H | 17.07189  | 4.77476  | -2.15638 |
| C | 16.99102  | 4.93223  | 0.05574  |
| H | 17.12992  | 6.04078  | 0.06586  |
| H | 16.54941  | 2.22805  | 2.23852  |
| C | 12.81665  | -0.45019 | -0.08432 |
| C | 19.72185  | -1.27921 | 0.09285  |
| H | 20.82285  | -1.44207 | 0.12553  |
| C | -13.67912 | -1.86832 | -0.11489 |
| C | -13.6259  | 0.46059  | 0.05276  |
| C | -15.02092 | -0.00719 | -0.00363 |
| C | -16.27907 | 0.70509  | 0.03111  |
| C | -17.53576 | 0.00213  | -0.03279 |
| C | -18.92738 | 0.47411  | -0.01522 |
| C | -18.86743 | -1.8609  | -0.17821 |
| N | -14.99943 | -1.44212 | -0.10578 |
| N | -17.55619 | -1.43605 | -0.1343  |
| B | -16.27626 | -2.39102 | -0.19617 |
| F | -16.24635 | -3.12142 | -1.43593 |
| F | -16.27239 | -3.30925 | 0.91054  |
| C | -13.04809 | 1.89968  | 0.16611  |
| H | -13.35718 | 2.54397  | -0.70463 |
| H | -13.40757 | 2.42151  | 1.09728  |
| H | -11.92318 | 1.8708   | 0.19543  |
| C | -19.25159 | -3.33775 | -0.29053 |
| H | -20.37051 | -3.42695 | -0.33643 |
| H | -18.80021 | -3.80258 | -1.21182 |
| H | -18.86441 | -3.92269 | 0.59126  |
| C | -19.45921 | 1.91356  | 0.07851  |
| H | -19.08802 | 2.56696  | -0.76076 |
| H | -20.58319 | 1.88139  | 0.033    |
| H | -19.16059 | 2.42128  | 1.03935  |
| C | -13.25872 | -3.35072 | -0.21296 |
| H | -13.68491 | -3.81661 | -1.14584 |
| H | -12.13988 | -3.45713 | -0.22703 |
| H | -13.67167 | -3.9325  | 0.65892  |
| C | -16.2526  | 2.24238  | 0.13645  |
| C | -16.28843 | 2.88575  | 1.4258   |
| C | -16.20664 | 3.05373  | -1.05418 |
| C | -16.27807 | 4.31859  | 1.5219   |
| C | -16.19713 | 4.48649  | -0.95635 |
| H | -16.17877 | 2.55962  | -2.05586 |
| H | -16.30578 | 4.80583  | 2.52696  |
| H | -16.16208 | 5.10493  | -1.88634 |
| C | -16.2323  | 5.12181  | 0.33167  |
| H | -16.22494 | 6.2365   | 0.40715  |
| H | -16.32371 | 2.26113  | 2.35165  |
| C | -12.78795 | -0.71383 | -0.0184  |
| C | -19.74445 | -0.69967 | -0.10482 |
| H | -20.81241 | -0.76252 | -0.08451 |

### Optimized ground state geometry of Pt-2

|    |   |          |          |          |
|----|---|----------|----------|----------|
| O  | 1 |          |          |          |
| C  |   | 4.90307  | 0.02071  | 1.2759   |
| C  |   | 5.9925   | -0.18279 | 1.81718  |
| C  |   | 9.55239  | -0.85907 | 3.5861   |
| Pt |   | 7.77132  | -0.51506 | 2.70099  |
| P  |   | 6.69165  | -0.20279 | 4.77169  |
| C  |   | 5.95091  | 1.47246  | 4.94509  |
| H  |   | 5.39914  | 1.55897  | 5.88731  |
| H  |   | 5.27477  | 1.64848  | 4.10445  |
| H  |   | 6.74325  | 2.2266   | 4.92072  |
| C  |   | 5.27774  | -1.35221 | 5.02563  |
| H  |   | 5.64501  | -2.38271 | 5.04348  |
| H  |   | 4.58146  | -1.24459 | 4.19006  |
| H  |   | 4.76245  | -1.13603 | 5.96766  |
| C  |   | 7.71216  | -0.40504 | 6.28703  |
| H  |   | 8.11527  | -1.42045 | 6.32085  |
| H  |   | 8.55429  | 0.29071  | 6.25635  |
| H  |   | 7.1103   | -0.21853 | 7.1828   |
| P  |   | 8.86747  | -0.82474 | 0.63879  |
| C  |   | 9.61428  | -2.497   | 0.46761  |
| H  |   | 10.171   | -2.58064 | -0.47194 |
| H  |   | 8.82451  | -3.25392 | 0.48749  |
| H  |   | 10.28637 | -2.66969 | 1.31203  |
| C  |   | 7.85678  | -0.62232 | -0.88365 |
| H  |   | 7.44582  | 0.39008  | -0.91537 |
| H  |   | 7.02059  | -1.32585 | -0.86409 |
| H  |   | 8.46616  | -0.79903 | -1.7763  |
| C  |   | 10.27902 | 0.32997  | 0.39773  |
| H  |   | 9.90773  | 1.35888  | 0.37283  |
| H  |   | 10.96496 | 0.2263   | 1.24224  |
| H  |   | 10.8058  | 0.11345  | -0.53785 |
| C  |   | -2.17243 | 0.09885  | -1.95549 |
| C  |   | -1.75096 | 2.34458  | -2.18446 |
| C  |   | -2.71146 | 1.34054  | -2.42937 |
| C  |   | -0.62761 | 1.69347  | -1.5941  |
| C  |   | 0.60126  | 2.21205  | -1.09637 |
| C  |   | 1.5491   | 1.32641  | -0.51156 |
| C  |   | 2.84085  | 1.56551  | 0.04463  |
| C  |   | 2.31363  | -0.66372 | 0.20508  |
| N  |   | -0.91469 | 0.31801  | -1.50351 |
| N  |   | 1.26985  | -0.04731 | -0.39921 |
| B  |   | -0.0282  | -0.75834 | -0.83783 |
| F  |   | -0.65702 | -1.37021 | 0.259    |
| F  |   | 0.26498  | -1.73853 | -1.79983 |
| C  |   | -1.94888 | 3.79484  | -2.51322 |
| H  |   | -1.92393 | 4.4347   | -1.62314 |
| H  |   | -1.18224 | 4.17889  | -3.19561 |
| H  |   | -2.92387 | 3.92354  | -2.99474 |
| C  |   | 2.34742  | -2.1229  | 0.49502  |
| H  |   | 3.29205  | -2.3871  | 0.97646  |
| H  |   | 1.51312  | -2.40887 | 1.14657  |
| H  |   | 2.23355  | -2.7039  | -0.42789 |
| C  |   | 3.6019   | 2.85201  | 0.17281  |

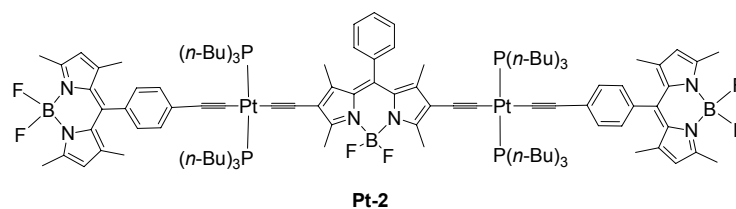

|    |           |          |          |
|----|-----------|----------|----------|
| H  | 3.0673    | 3.5975   | 0.77285  |
| H  | 4.56273   | 2.65317  | 0.65891  |
| H  | 3.80437   | 3.31899  | -0.79796 |
| C  | -2.82792  | -1.23702 | -1.93851 |
| H  | -2.85243  | -1.64353 | -0.92079 |
| H  | -3.84708  | -1.15893 | -2.32462 |
| H  | -2.26253  | -1.95435 | -2.54573 |
| C  | 0.9164    | 3.66658  | -1.23677 |
| C  | 1.58025   | 4.14951  | -2.37566 |
| C  | 0.55774   | 4.58332  | -0.23593 |
| C  | 1.87761   | 5.50762  | -2.51179 |
| C  | 0.8534    | 5.94228  | -0.36835 |
| H  | 0.0438    | 4.22332  | 0.65156  |
| H  | 2.39194   | 5.86152  | -3.40162 |
| H  | 0.56777   | 6.63625  | 0.41807  |
| C  | 1.5145    | 6.40822  | -1.50738 |
| H  | 1.74505   | 7.46519  | -1.61142 |
| H  | 1.86326   | 3.45062  | -3.15849 |
| C  | 3.32122   | 0.31618  | 0.48995  |
| C  | -4.32689  | 1.61677  | -3.16842 |
| C  | -5.43526  | 1.80629  | -3.6755  |
| C  | -9.05778  | 2.42573  | -5.3328  |
| Pt | -7.24439  | 2.11565  | -4.50318 |
| P  | -6.58496  | 1.20666  | -6.57466 |
| C  | -6.74178  | 2.41287  | -7.95458 |
| H  | -6.49006  | 1.94672  | -8.91324 |
| H  | -6.0707   | 3.25857  | -7.7771  |
| H  | -7.77014  | 2.7822   | -7.98054 |
| C  | -4.85885  | 0.58914  | -6.70725 |
| H  | -4.69731  | -0.20446 | -5.97326 |
| H  | -4.16326  | 1.40219  | -6.48421 |
| H  | -4.66366  | 0.20385  | -7.7136  |
| C  | -7.6204   | -0.22086 | -7.09783 |
| H  | -7.50329  | -1.03884 | -6.38071 |
| H  | -8.66793  | 0.09099  | -7.105   |
| H  | -7.33056  | -0.57061 | -8.09453 |
| P  | -7.92243  | 3.02927  | -2.43932 |
| C  | -9.65396  | 3.63293  | -2.31962 |
| H  | -9.85335  | 4.03301  | -1.31989 |
| H  | -10.3413  | 2.80963  | -2.52987 |
| H  | -9.82211  | 4.4112   | -3.0682  |
| C  | -7.76317  | 1.83344  | -1.05025 |
| H  | -6.73055  | 1.47729  | -1.0092  |
| H  | -8.42064  | 0.97754  | -1.2297  |
| H  | -8.03136  | 2.30169  | -0.09709 |
| C  | -6.90292  | 4.46919  | -1.91729 |
| H  | -5.85179  | 4.16971  | -1.90107 |
| H  | -7.02349  | 5.28261  | -2.63901 |
| H  | -7.20221  | 4.82122  | -0.92418 |
| C  | -10.16186 | 2.61452  | -5.83791 |
| C  | 10.63659  | -1.06848 | 4.1249   |
| C  | 17.93401  | 0.14024  | 8.77974  |
| C  | 15.96895  | 0.52987  | 7.65719  |
| C  | 16.32811  | -0.8465  | 7.55243  |

|   |           |          |           |
|---|-----------|----------|-----------|
| C | 15.68747  | -1.93567 | 6.89805   |
| C | 16.27521  | -3.23027 | 6.95515   |
| C | 15.86259  | -4.47577 | 6.39513   |
| C | 17.82207  | -4.74625 | 7.56152   |
| N | 17.53301  | -1.04054 | 8.25136   |
| N | 17.47538  | -3.4404  | 7.65726   |
| B | 18.29242  | -2.37409 | 8.41736   |
| F | 19.58421  | -2.27176 | 7.87547   |
| F | 18.39414  | -2.71207 | 9.77663   |
| C | 14.77863  | 1.25054  | 7.09659   |
| H | 14.75108  | 1.22731  | 6.00069   |
| H | 13.82956  | 0.82527  | 7.442     |
| H | 14.8129   | 2.29868  | 7.41166   |
| C | 19.04125  | -5.3189  | 8.19402   |
| H | 19.10307  | -6.38979 | 7.98596   |
| H | 19.94359  | -4.82148 | 7.81893   |
| H | 19.02667  | -5.15846 | 9.27862   |
| C | 14.65941  | -4.79402 | 5.55741   |
| H | 14.63648  | -4.22256 | 4.62225   |
| H | 14.67174  | -5.85882 | 5.30231   |
| H | 13.71774  | -4.58165 | 6.07665   |
| C | 19.17295  | 0.29701  | 9.589     |
| H | 20.05042  | -0.03539 | 9.02228   |
| H | 19.30088  | 1.34265  | 9.8791    |
| H | 19.12995  | -0.32793 | 10.48931  |
| C | 14.40177  | -1.72382 | 6.16539   |
| C | 13.16783  | -1.94629 | 6.80172   |
| C | 14.39449  | -1.35608 | 4.81061   |
| C | 12.0246   | -1.69846 | 6.13503   |
| C | 13.12843  | -1.11859 | 4.03137   |
| H | 15.3412   | -1.22546 | 4.29287   |
| H | 11.10668  | -1.7953  | 6.70918   |
| H | 13.04969  | -0.82982 | 2.98635   |
| C | 11.97355  | -1.32672 | 4.78931   |
| H | 13.15937  | -2.22789 | 7.85148   |
| C | -17.95005 | 1.60049  | -9.07061  |
| C | -15.94176 | 1.13134  | -8.06065  |
| C | -15.99784 | 2.50996  | -8.42209  |
| C | -15.05365 | 3.56177  | -8.25741  |
| C | -15.37454 | 4.8691   | -8.7185   |
| C | -14.62902 | 6.08507  | -8.69135  |
| C | -16.67551 | 6.43664  | -9.67189  |
| N | -17.23992 | 2.75318  | -9.0353   |
| N | -16.61597 | 5.12841  | -9.32606  |
| B | -17.74505 | 4.1068   | -9.57861  |
| F | -18.01743 | 4.01088  | -10.95318 |
| F | -18.91623 | 4.49554  | -8.90824  |
| C | -14.84428 | 0.36723  | -7.38082  |
| H | -13.91815 | 0.35036  | -7.96757  |
| H | -14.58601 | 0.78559  | -6.40144  |
| H | -15.16801 | -0.66797 | -7.23047  |
| C | -17.85481 | 7.05604  | -10.3352  |
| H | -17.6724  | 8.11975  | -10.50596 |
| H | -18.06543 | 6.56359  | -11.29201 |

|   |           |          |          |
|---|-----------|----------|----------|
| H | -18.75378 | 6.93456  | -9.71926 |
| C | -13.25159 | 6.34875  | -8.15852 |
| H | -12.48593 | 5.74358  | -8.65767 |
| H | -13.00288 | 7.40368  | -8.3143  |
| H | -13.16798 | 6.13642  | -7.08643 |
| C | -19.31709 | 1.49786  | -9.64954 |
| H | -19.32066 | 1.82711  | -10.6951 |
| H | -19.67204 | 0.46614  | -9.59092 |
| H | -20.01498 | 2.15388  | -9.11517 |
| C | -13.73938 | 3.29792  | -7.59576 |
| C | -13.61045 | 3.37717  | -6.1944  |
| C | -12.63608 | 2.8407   | -8.33605 |
| C | -12.36315 | 3.21678  | -5.58618 |
| C | -11.39791 | 2.63579  | -7.7223  |
| H | -12.73785 | 2.71058  | -9.41034 |
| H | -12.25096 | 3.41458  | -4.52322 |
| H | -10.539   | 2.34626  | -8.32238 |
| C | -11.26344 | 2.80289  | -6.34189 |
| H | -14.4648  | 3.69885  | -5.60451 |
| C | -17.16592 | 0.5611   | -8.46919 |
| H | -17.4462  | -0.4642  | -8.34634 |
| C | -15.44557 | 7.06741  | -9.28981 |
| H | -15.18215 | 8.09527  | -9.42768 |
| C | 16.8335   | -5.42574 | 6.77563  |
| H | 16.82224  | -6.46403 | 6.51731  |
| C | 16.97751  | 1.14856  | 8.42574  |
| H | 17.01068  | 2.18494  | 8.6898   |

### Optimized triplet state geometry of Pt-a

|     |         |          |          |
|-----|---------|----------|----------|
| o 3 |         |          |          |
| C   | 1.90253 | -0.07808 | -0.03096 |
| P   | 3.91845 | 0.41903  | -2.36408 |
| C   | 4.6862  | 2.01973  | -2.84505 |
| H   | 4.77204 | 2.09804  | -3.93429 |
| H   | 5.67755 | 2.08349  | -2.38928 |
| H   | 4.07359 | 2.84531  | -2.4705  |
| C   | 4.92241 | -0.85424 | -3.23277 |
| H   | 4.4621  | -1.83689 | -3.09272 |
| H   | 5.92348 | -0.8708  | -2.79469 |
| H   | 4.98805 | -0.63467 | -4.30395 |
| C   | 2.3081  | 0.40319  | -3.25046 |
| H   | 1.8164  | -0.56064 | -3.09614 |
| H   | 1.65818 | 1.18198  | -2.84357 |
| H   | 2.45883 | 0.57126  | -4.32206 |
| P   | 3.76891 | -0.22558 | 2.30827  |
| C   | 3.03453 | -1.84409 | 2.7823   |
| H   | 2.93938 | -1.92701 | 3.87027  |
| H   | 3.66944 | -2.65491 | 2.41283  |
| H   | 2.04903 | -1.93213 | 2.31798  |
| C   | 5.36155 | -0.16215 | 3.22373  |
| H   | 5.83466 | 0.81045  | 3.06767  |
| H   | 6.03663 | -0.93    | 2.83858  |
| H   | 5.19043 | -0.32216 | 4.29372  |

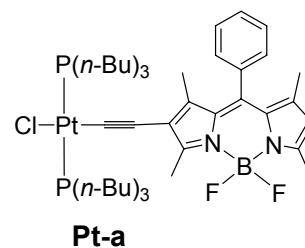

|    |          |          |          |
|----|----------|----------|----------|
| C  | 2.70959  | 1.01779  | 3.15484  |
| H  | 3.1398   | 2.01449  | 3.0179   |
| H  | 1.7167   | 1.00074  | 2.69815  |
| H  | 2.62973  | 0.80245  | 4.22573  |
| C  | 0.68048  | -0.187   | -0.03342 |
| C  | -1.44428 | -1.54651 | -0.13041 |
| C  | -1.68952 | 0.71397  | 0.04691  |
| C  | -0.73395 | -0.31307 | -0.03626 |
| C  | -2.97072 | 0.07968  | 0.00454  |
| C  | -4.27556 | 0.59665  | 0.05016  |
| C  | -5.39644 | -0.25159 | -0.01047 |
| C  | -6.80433 | 0.01991  | 0.02185  |
| C  | -6.44939 | -2.21904 | -0.15503 |
| N  | -2.76456 | -1.30436 | -0.10417 |
| N  | -5.23087 | -1.63841 | -0.11954 |
| B  | -3.87569 | -2.39018 | -0.18892 |
| F  | -3.77182 | -3.08818 | -1.39607 |
| F  | -3.75831 | -3.27679 | 0.88543  |
| C  | -1.34497 | 2.16821  | 0.15549  |
| H  | -1.77064 | 2.75619  | -0.66474 |
| H  | -1.71585 | 2.61265  | 1.08587  |
| H  | -0.25699 | 2.28171  | 0.13214  |
| C  | -6.63933 | -3.69715 | -0.26785 |
| H  | -7.70356 | -3.94519 | -0.28239 |
| H  | -6.17038 | -4.07952 | -1.18098 |
| H  | -6.16318 | -4.21411 | 0.57231  |
| C  | -7.52449 | 1.33241  | 0.12938  |
| H  | -7.29198 | 2.00048  | -0.70684 |
| H  | -8.60527 | 1.15988  | 0.13406  |
| H  | -7.26377 | 1.87361  | 1.04519  |
| C  | -0.86568 | -2.91694 | -0.24411 |
| H  | -1.23322 | -3.41636 | -1.14678 |
| H  | 0.22457  | -2.85852 | -0.2783  |
| H  | -1.17026 | -3.53709 | 0.60626  |
| C  | -4.47906 | 2.07357  | 0.16697  |
| C  | -4.56915 | 2.67862  | 1.42813  |
| C  | -4.58483 | 2.86819  | -0.98305 |
| C  | -4.76201 | 4.05742  | 1.53678  |
| C  | -4.77704 | 4.247    | -0.87246 |
| H  | -4.51559 | 2.40384  | -1.96293 |
| H  | -4.83084 | 4.51549  | 2.51963  |
| H  | -4.85695 | 4.85298  | -1.77077 |
| C  | -4.86622 | 4.84429  | 0.38719  |
| H  | -5.01602 | 5.91695  | 0.47257  |
| H  | -4.4887  | 2.06662  | 2.32229  |
| Cl | 6.12978  | 0.29868  | -0.02244 |
| Pt | 3.85878  | 0.09627  | -0.02702 |
| C  | -7.43563 | -1.21788 | -0.06951 |
| H  | -8.50392 | -1.39324 | -0.0745  |

### Optimized triplet state geometry of Pt-b

|    |         |         |         |
|----|---------|---------|---------|
| O3 |         |         |         |
| C  | 2.50952 | 0.00691 | 0.00567 |

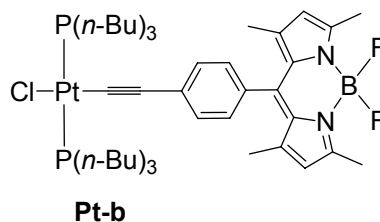

|    |          |          |          |
|----|----------|----------|----------|
| Pt | 4.47032  | -0.0133  | -0.0133  |
| P  | 4.31963  | -1.67937 | -1.67782 |
| C  | 3.40876  | -1.11108 | -3.17157 |
| H  | 3.28484  | -1.92813 | -3.89027 |
| H  | 3.96261  | -0.2947  | -3.64468 |
| H  | 2.42942  | -0.73551 | -2.86423 |
| C  | 5.89888  | -2.34931 | -2.33516 |
| H  | 6.47816  | -2.78649 | -1.51829 |
| H  | 6.48788  | -1.53734 | -2.76836 |
| H  | 5.70034  | -3.11058 | -3.09725 |
| C  | 3.39364  | -3.16565 | -1.11414 |
| H  | 3.93777  | -3.64092 | -0.29249 |
| H  | 2.4134   | -2.85103 | -0.74707 |
| H  | 3.27157  | -3.88508 | -1.93083 |
| P  | 4.60796  | 1.65341  | 1.65284  |
| C  | 3.02528  | 2.31382  | 2.31434  |
| H  | 3.21598  | 3.07694  | 3.07621  |
| H  | 2.44417  | 1.49758  | 2.75126  |
| H  | 2.44193  | 2.74853  | 1.49856  |
| C  | 5.52069  | 1.08705  | 3.14551  |
| H  | 6.50087  | 0.71633  | 2.83562  |
| H  | 4.96963  | 0.26897  | 3.61893  |
| H  | 5.64124  | 1.90592  | 3.86291  |
| C  | 5.51941  | 3.14661  | 1.0859   |
| H  | 6.49948  | 2.83728  | 0.71442  |
| H  | 4.96746  | 3.61983  | 0.26832  |
| H  | 5.6402   | 3.86395  | 1.90478  |
| C  | 1.28276  | 0.00091  | -0.00089 |
| C  | -6.98304 | -1.9362  | 1.62229  |
| C  | -4.70983 | -1.98386 | 1.65018  |
| C  | -5.16859 | -0.93045 | 0.79019  |
| C  | -4.47571 | 0.01373  | 0.01347  |
| C  | -5.16797 | 0.96134  | -0.75963 |
| C  | -4.70853 | 2.01274  | -1.62171 |
| C  | -6.98177 | 1.97614  | -1.58212 |
| N  | -6.56989 | -0.94322 | 0.80784  |
| N  | -6.56926 | 0.98098  | -0.76999 |
| B  | -7.49925 | 0.02077  | 0.02086  |
| F  | -8.30646 | -0.70338 | -0.86237 |
| F  | -8.29989 | 0.74816  | 0.90741  |
| C  | -3.30788 | -2.4013  | 1.98574  |
| H  | -2.7403  | -2.69304 | 1.0958   |
| H  | -2.742   | -1.59723 | 2.46864  |
| H  | -3.33157 | -3.25597 | 2.66899  |
| C  | -8.42503 | 2.28184  | -1.82062 |
| H  | -8.52873 | 3.09396  | -2.54439 |
| H  | -8.9506  | 1.39708  | -2.19477 |
| H  | -8.91912 | 2.57168  | -0.88659 |
| C  | -3.30631 | 2.42338  | -1.96454 |
| H  | -2.74753 | 1.61709  | -2.45204 |
| H  | -3.32938 | 3.27925  | -2.64629 |
| H  | -2.73205 | 2.71058  | -1.07744 |
| C  | -8.42653 | -2.235   | 1.86807  |
| H  | -8.92645 | -2.52333 | 0.93667  |



|    |          |          |          |
|----|----------|----------|----------|
| H  | -8.53048 | -3.04607 | 2.59298  |
| H  | -8.94619 | -1.34752 | 2.24398  |
| C  | -2.98158 | 0.01018  | 0.00969  |
| C  | -2.2624  | 0.77796  | 0.93682  |
| C  | -2.27082 | -0.76099 | -0.92109 |
| C  | -0.87025 | 0.77654  | 0.93452  |
| C  | -0.8787  | -0.76591 | -0.92575 |
| H  | -2.81421 | -1.36138 | -1.64576 |
| H  | -0.32844 | 1.37672  | 1.65906  |
| H  | -0.3434  | -1.36883 | -1.65316 |
| C  | -0.14429 | 0.00368  | 0.00244  |
| H  | -2.7993  | 1.38089  | 1.66423  |
| Cl | 6.93154  | -0.02967 | -0.02928 |
| C  | -5.8551  | -2.59236 | 2.15432  |
| H  | -5.88726 | -3.4297  | 2.8398   |
| C  | -5.8534  | 2.62693  | -2.11981 |
| H  | -5.885   | 3.46463  | -2.80487 |

### Optimized triplet state geometry of Pt-1

|     |           |          |          |
|-----|-----------|----------|----------|
| o 3 |           |          |          |
| C   | -4.81501  | -0.21494 | 0.00301  |
| C   | -6.03098  | -0.29468 | 0.01218  |
| C   | -10.08621 | -0.50106 | 0.02474  |
| Pt  | -8.0533   | -0.41344 | 0.02011  |
| P   | -7.93503  | -0.75673 | -2.30459 |
| C   | -7.12781  | 0.64083  | -3.18869 |
| H   | -7.02572  | 0.42276  | -4.25731 |
| H   | -6.14161  | 0.80825  | -2.74819 |
| H   | -7.72685  | 1.54747  | -3.06057 |
| C   | -6.92293  | -2.223   | -2.76427 |
| H   | -7.39028  | -3.12862 | -2.36606 |
| H   | -5.93097  | -2.11633 | -2.31827 |
| H   | -6.83423  | -2.31134 | -3.85255 |
| C   | -9.51604  | -1.00512 | -3.20894 |
| H   | -10.03542 | -1.87761 | -2.80461 |
| H   | -10.15976 | -0.1337  | -3.06586 |
| H   | -9.32681  | -1.15289 | -4.27756 |
| P   | -8.1678   | -0.08989 | 2.34728  |
| C   | -9.01093  | -1.47817 | 3.21244  |
| H   | -9.10706  | -1.27258 | 4.28408  |
| H   | -8.43523  | -2.39792 | 3.07142  |
| H   | -10.00114 | -1.61501 | 2.77031  |
| C   | -6.58172  | 0.10677  | 3.25535  |
| H   | -6.03445  | 0.96315  | 2.85362  |
| H   | -5.96511  | -0.7839  | 3.11077  |
| H   | -6.76803  | 0.25601  | 4.32428  |
| C   | -9.14289  | 1.3954   | 2.82684  |
| H   | -8.64914  | 2.2951   | 2.44739  |
| H   | -10.13495 | 1.3234   | 2.37416  |
| H   | -9.2354   | 1.46668  | 3.91606  |
| C   | 2.54238   | -1.135   | 0.05384  |
| C   | 2.55308   | 1.14177  | -0.06222 |
| C   | 3.38502   | 0.01126  | -0.00534 |

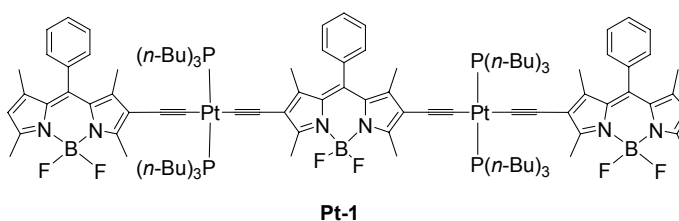

|    |          |          |          |
|----|----------|----------|----------|
| C  | 1.20943  | 0.65661  | -0.03809 |
| C  | -0.02983 | 1.31985  | -0.07224 |
| C  | -1.24116 | 0.60671  | -0.03551 |
| C  | -2.60349 | 1.03655  | -0.06393 |
| C  | -2.50064 | -1.23667 | 0.06699  |
| N  | 1.25733  | -0.74375 | 0.03348  |
| N  | -1.23196 | -0.7938  | 0.04424  |
| B  | 0.03156  | -1.69635 | 0.09178  |
| F  | 0.04328  | -2.56256 | -1.00554 |
| F  | 0.05296  | -2.43247 | 1.28054  |
| C  | 3.06045  | 2.55023  | -0.13035 |
| H  | 2.7416   | 3.06127  | -1.04566 |
| H  | 2.70555  | 3.15884  | 0.7084   |
| H  | 4.15438  | 2.53856  | -0.10632 |
| C  | -2.86063 | -2.68207 | 0.14915  |
| H  | -3.94672 | -2.79122 | 0.19144  |
| H  | -2.47446 | -3.22759 | -0.71919 |
| H  | -2.41234 | -3.14214 | 1.0362   |
| C  | -3.16843 | 2.42205  | -0.14801 |
| H  | -2.83952 | 2.9482   | -1.05079 |
| H  | -4.26092 | 2.36267  | -0.16306 |
| H  | -2.87046 | 3.04358  | 0.70368  |
| C  | 2.96111  | -2.56509 | 0.12782  |
| H  | 2.5557   | -3.13142 | -0.71765 |
| H  | 4.05135  | -2.63319 | 0.12111  |
| H  | 2.57281  | -3.03511 | 1.03804  |
| C  | -0.06024 | 2.81344  | -0.1429  |
| C  | -0.09415 | 3.57583  | 1.03301  |
| C  | -0.05517 | 3.46804  | -1.38244 |
| C  | -0.12103 | 4.97066  | 0.97008  |
| C  | -0.08318 | 4.86292  | -1.44384 |
| H  | -0.02926 | 2.88241  | -2.29734 |
| H  | -0.14704 | 5.55081  | 1.88855  |
| H  | -0.08021 | 5.35938  | -2.41041 |
| C  | -0.11516 | 5.6171   | -0.26844 |
| H  | -0.13502 | 6.7023   | -0.31822 |
| H  | -0.09857 | 3.07279  | 1.99615  |
| C  | -3.39092 | -0.1267  | 0.00007  |
| C  | 4.82302  | -0.02537 | -0.00324 |
| C  | 6.02368  | -0.07792 | 0.00344  |
| C  | 10.0717  | -0.32266 | -0.02212 |
| Pt | 8.05538  | -0.19533 | -0.0095  |
| P  | 8.15917  | -0.51342 | 2.31885  |
| C  | 9.20447  | 0.74087  | 3.16737  |
| H  | 9.29044  | 0.52129  | 4.23701  |
| H  | 8.76032  | 1.73231  | 3.03687  |
| H  | 10.19545 | 0.73902  | 2.70654  |
| C  | 6.57219  | -0.47114 | 3.24635  |
| H  | 5.89814  | -1.23565 | 2.85233  |
| H  | 6.0955   | 0.50231  | 3.10515  |
| H  | 6.74501  | -0.64437 | 4.31388  |
| C  | 8.91514  | -2.12293 | 2.79238  |
| H  | 8.29051  | -2.94331 | 2.4263   |
| H  | 9.9007   | -2.19819 | 2.32586  |

|   |           |          |          |
|---|-----------|----------|----------|
| H | 9.01391   | -2.20262 | 3.88039  |
| P | 7.94743   | 0.11415  | -2.33841 |
| C | 9.53521   | 0.07724  | -3.26489 |
| H | 9.36162   | 0.24257  | -4.33356 |
| H | 10.0184   | -0.89204 | -3.11748 |
| H | 10.20386  | 0.84887  | -2.87536 |
| C | 6.9098    | -1.14975 | -3.18187 |
| H | 5.91817   | -1.15077 | -2.7224  |
| H | 7.35843   | -2.13843 | -3.04582 |
| H | 6.82432   | -0.93615 | -4.2528  |
| C | 7.1829    | 1.71733  | -2.82005 |
| H | 6.19706   | 1.78924  | -2.35356 |
| H | 7.80317   | 2.54262  | -2.45765 |
| H | 7.08389   | 1.79129  | -3.90846 |
| C | -11.28786 | -0.52498 | 0.02913  |
| C | 11.2984   | -0.40234 | -0.01365 |
| C | 18.48288  | -2.24724 | 0.00023  |
| C | 18.77431  | 0.00746  | 0.04263  |
| C | 17.37549  | -0.30452 | 0.02291  |
| C | 16.23053  | 0.51476  | 0.02838  |
| C | 14.94157  | -0.0399  | 0.01027  |
| C | 13.64269  | 0.5602   | 0.01346  |
| C | 13.45999  | -1.71161 | -0.02739 |
| N | 17.24826  | -1.69909 | -0.00238 |
| N | 14.77335  | -1.4333  | -0.0158  |
| B | 15.91431  | -2.49096 | -0.02637 |
| F | 15.83514  | -3.2693  | -1.18547 |
| F | 15.81689  | -3.30921 | 1.10335  |
| C | 19.45788  | 1.34363  | 0.07254  |
| H | 19.21455  | 1.95227  | -0.8051  |
| H | 19.17587  | 1.93391  | 0.95099  |
| H | 20.54284  | 1.20079  | 0.09454  |
| C | 12.91929  | -3.1016  | -0.05582 |
| H | 11.82776  | -3.07495 | -0.08741 |
| H | 13.29695  | -3.64416 | -0.92902 |
| H | 13.2449   | -3.66057 | 0.82843  |
| C | 13.25841  | 2.00821  | 0.03396  |
| H | 13.66008  | 2.55432  | -0.82651 |
| H | 12.1675   | 2.0889   | 0.01431  |
| H | 13.62435  | 2.52084  | 0.9304   |
| C | 18.71312  | -3.7238  | -0.02307 |
| H | 18.25947  | -4.17328 | -0.91304 |
| H | 19.78372  | -3.94304 | -0.01897 |
| H | 18.247    | -4.20242 | 0.84498  |
| C | 16.39088  | 2.00135  | 0.05399  |
| C | 16.43665  | 2.68901  | 1.27473  |
| C | 16.49463  | 2.724    | -1.14267 |
| C | 16.58345  | 4.07763  | 1.29734  |
| C | 16.64045  | 4.11267  | -1.1182  |
| H | 16.45925  | 2.19595  | -2.09165 |
| H | 16.61707  | 4.60021  | 2.24941  |
| H | 16.71872  | 4.66227  | -2.05221 |
| C | 16.6853   | 4.79229  | 0.10137  |
| H | 16.79912  | 5.8726   | 0.11952  |

|   |           |          |          |
|---|-----------|----------|----------|
| H | 16.35468  | 2.13382  | 2.20514  |
| C | 12.7148   | -0.49458 | -0.00858 |
| C | 19.44039  | -1.21606 | 0.02826  |
| H | 20.51327  | -1.36106 | 0.03783  |
| C | -13.52694 | -1.72667 | -0.02423 |
| C | -13.59811 | 0.55084  | 0.04883  |
| C | -14.92425 | 0.01553  | 0.02057  |
| C | -16.1843  | 0.63313  | 0.02839  |
| C | -17.36818 | -0.12787 | -0.01256 |
| C | -18.74995 | 0.25304  | -0.00755 |
| C | -18.56997 | -2.01173 | -0.09642 |
| N | -14.8247  | -1.38437 | -0.02509 |
| N | -17.30966 | -1.52629 | -0.06772 |
| B | -16.01671 | -2.38387 | -0.0793  |
| F | -15.94896 | -3.14504 | -1.25048 |
| F | -15.98681 | -3.22668 | 1.03611  |
| C | -13.1448  | 1.97855  | 0.09216  |
| H | -13.52322 | 2.55826  | -0.75668 |
| H | -13.48298 | 2.49268  | 0.99881  |
| H | -12.0513  | 2.00872  | 0.06822  |
| C | -18.87351 | -3.474   | -0.15389 |
| H | -19.95346 | -3.63814 | -0.18594 |
| H | -18.41561 | -3.93045 | -1.03796 |
| H | -18.45947 | -3.99043 | 0.71902  |
| C | -19.36705 | 1.6206   | 0.0462   |
| H | -19.08798 | 2.23558  | -0.81626 |
| H | -20.45787 | 1.53147  | 0.05802  |
| H | -19.06235 | 2.17648  | 0.93932  |
| C | -13.05454 | -3.14073 | -0.06797 |
| H | -13.41355 | -3.63868 | -0.97523 |
| H | -11.96282 | -3.16904 | -0.04528 |
| H | -13.45237 | -3.70661 | 0.78123  |
| C | -16.27203 | 2.12538  | 0.07787  |
| C | -16.2923  | 2.79569  | 1.30897  |
| C | -16.33417 | 2.87087  | -1.10775 |
| C | -16.37309 | 4.18937  | 1.35232  |
| C | -16.4144  | 4.26436  | -1.0627  |
| H | -16.31797 | 2.35657  | -2.06472 |
| H | -16.38794 | 4.69797  | 2.31249  |
| H | -16.46241 | 4.83055  | -1.98892 |
| C | -16.43382 | 4.92667  | 0.16721  |
| H | -16.49522 | 6.01095  | 0.202    |
| H | -16.24329 | 2.22303  | 2.23117  |
| C | -12.72593 | -0.54824 | 0.02215  |
| C | -19.47554 | -0.93508 | -0.06082 |
| H | -20.55427 | -1.02678 | -0.07231 |

### Optimized triplet state geometry of Pt-2

|     |           |          |         |
|-----|-----------|----------|---------|
| O 3 |           |          |         |
| C   | -4.81004  | 0.18407  | 0.15626 |
| C   | -6.03707  | 0.11742  | 0.14071 |
| C   | -10.06821 | -0.13768 | 0.02745 |
| Pt  | -8.05463  | -0.00921 | 0.08598 |

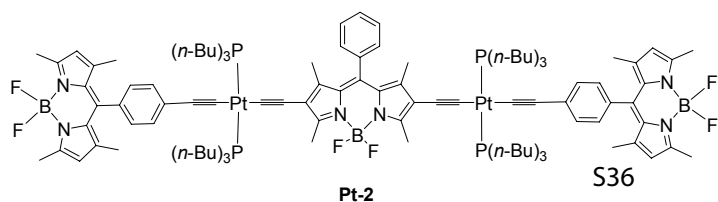

|   |           |          |          |
|---|-----------|----------|----------|
| P | -7.89227  | 0.31895  | -2.23858 |
| C | -7.11964  | 1.92908  | -2.68144 |
| H | -6.99274  | 2.01616  | -3.76592 |
| H | -6.14675  | 1.99792  | -2.18831 |
| H | -7.75198  | 2.74793  | -2.32531 |
| C | -6.83417  | -0.93437 | -3.07186 |
| H | -7.28357  | -1.9253  | -2.95644 |
| H | -5.85274  | -0.93808 | -2.59137 |
| H | -6.72559  | -0.70898 | -4.13822 |
| C | -9.45533  | 0.29339  | -3.20751 |
| H | -9.94046  | -0.67892 | -3.08782 |
| H | -10.1344  | 1.05998  | -2.82603 |
| H | -9.25332  | 0.47408  | -4.26867 |
| P | -8.20292  | -0.33324 | 2.41105  |
| C | -9.00071  | -1.92749 | 2.8668   |
| H | -9.11949  | -2.00863 | 3.95269  |
| H | -8.38557  | -2.75839 | 2.50856  |
| H | -9.97877  | -1.9828  | 2.38206  |
| C | -6.63072  | -0.33086 | 3.36401  |
| H | -6.12486  | 0.62842  | 3.2281   |
| H | -5.97184  | -1.11538 | 2.98366  |
| H | -6.82616  | -0.49672 | 4.42883  |
| C | -9.23228  | 0.94252  | 3.24742  |
| H | -8.7596   | 1.92283  | 3.13424  |
| H | -10.21311 | 0.97135  | 2.76608  |
| H | -9.34698  | 0.71796  | 4.31335  |
| C | 2.51913   | -0.8678  | -0.08403 |
| C | 2.57995   | 1.36205  | 0.38529  |
| C | 3.3897    | 0.23799  | 0.1405   |
| C | 1.2256    | 0.91388  | 0.30051  |
| C | 0.00144   | 1.58947  | 0.44975  |
| C | -1.225    | 0.91563  | 0.31303  |
| C | -2.57804  | 1.36698  | 0.4041   |
| C | -2.52435  | -0.86626 | -0.04998 |
| N | 1.24252   | -0.45872 | 0.01123  |
| N | -1.24642  | -0.45872 | 0.03247  |
| B | -0.00349  | -1.37059 | -0.16019 |
| F | -0.01577  | -1.93264 | -1.44056 |
| F | 0.00604   | -2.38267 | 0.80412  |
| C | 3.11878   | 2.73082  | 0.67173  |
| H | 2.81915   | 3.46081  | -0.08878 |
| H | 2.77141   | 3.12069  | 1.63459  |
| H | 4.21192   | 2.68771  | 0.69355  |
| C | -2.91507  | -2.27814 | -0.33205 |
| H | -4.00366  | -2.36868 | -0.33215 |
| H | -2.52238  | -2.60242 | -1.302   |
| H | -2.49366  | -2.9529  | 0.42097  |
| C | -3.11324  | 2.73956  | 0.67916  |
| H | -2.78858  | 3.46821  | -0.07193 |
| H | -4.20689  | 2.70493  | 0.6727   |
| H | -2.78727  | 3.12499  | 1.6515   |
| C | 2.90509   | -2.27842 | -0.37872 |
| H | 2.45298   | -2.61491 | -1.3176  |
| H | 3.99229   | -2.35864 | -0.44772 |

|    |           |          |          |
|----|-----------|----------|----------|
| H  | 2.54091   | -2.95062 | 0.4064   |
| C  | 0.00378   | 3.05092  | 0.76699  |
| C  | -0.00548  | 3.48341  | 2.10041  |
| C  | 0.01488   | 4.00395  | -0.26072 |
| C  | -0.00317  | 4.84712  | 2.40071  |
| C  | 0.01629   | 5.36761  | 0.04113  |
| H  | 0.0219    | 3.67449  | -1.29612 |
| H  | -0.00986  | 5.16993  | 3.43822  |
| H  | 0.02434   | 6.09704  | -0.76418 |
| C  | 0.00751   | 5.79213  | 1.37187  |
| H  | 0.00893   | 6.85311  | 1.60587  |
| H  | -0.0141   | 2.74875  | 2.90092  |
| C  | -3.39125  | 0.24265  | 0.17338  |
| C  | 4.80828   | 0.17738  | 0.11414  |
| C  | 6.03517   | 0.10936  | 0.09153  |
| C  | 10.06835  | -0.10515 | -0.02495 |
| Pt | 8.05362   | 0.0022   | 0.03262  |
| P  | 8.16871   | -1.00038 | 2.15817  |
| C  | 9.13662   | 0.00083  | 3.36111  |
| H  | 9.22992   | -0.51904 | 4.32071  |
| H  | 8.63846   | 0.96219  | 3.51844  |
| H  | 10.12876  | 0.18715  | 2.94206  |
| C  | 6.57941   | -1.32528 | 3.02224  |
| H  | 5.96489   | -1.99497 | 2.41542  |
| H  | 6.03377   | -0.38628 | 3.14397  |
| H  | 6.75892   | -1.77799 | 4.00317  |
| C  | 9.01638   | -2.63356 | 2.14338  |
| H  | 8.44016   | -3.33712 | 1.53502  |
| H  | 10.00468  | -2.51118 | 1.69286  |
| H  | 9.11758   | -3.03328 | 3.15815  |
| P  | 7.92441   | 1.00054  | -2.09443 |
| C  | 9.50545   | 1.29996  | -2.98406 |
| H  | 9.31845   | 1.75826  | -3.96099 |
| H  | 10.03053  | 0.35087  | -3.119   |
| H  | 10.14173  | 1.95704  | -2.3857  |
| C  | 6.92388   | 0.01258  | -3.28092 |
| H  | 5.93359   | -0.15168 | -2.84882 |
| H  | 7.40143   | -0.95908 | -3.43897 |
| H  | 6.82958   | 0.52979  | -4.24184 |
| C  | 7.10449   | 2.64767  | -2.07312 |
| H  | 6.11815   | 2.54122  | -1.61459 |
| H  | 7.69754   | 3.34254  | -1.47097 |
| H  | 7.00033   | 3.04747  | -3.08757 |
| C  | 11.29497  | -0.178   | -0.04345 |
| C  | -11.29479 | -0.20924 | 0.00404  |
| C  | -19.62161 | 1.90618  | -0.82887 |
| C  | -17.3535  | 2.04518  | -0.74933 |
| C  | -17.7722  | 0.69694  | -0.49153 |
| C  | -17.04421 | -0.47381 | -0.21787 |
| C  | -17.70041 | -1.69719 | 0.00032  |
| C  | -17.20249 | -3.01051 | 0.29404  |
| C  | -19.47374 | -3.04436 | 0.1923   |
| N  | -19.17207 | 0.66468  | -0.55161 |
| N  | -19.09909 | -1.77139 | -0.05166 |

|   |           |          |          |
|---|-----------|----------|----------|
| B | -20.06422 | -0.58825 | -0.33637 |
| F | -20.9177  | -0.39047 | 0.75396  |
| F | -20.8167  | -0.84641 | -1.48699 |
| C | -15.96953 | 2.623    | -0.80323 |
| H | -15.43459 | 2.5024   | 0.14483  |
| H | -15.35324 | 2.14643  | -1.57301 |
| H | -16.02566 | 3.69275  | -1.02768 |
| C | -20.90393 | -3.47716 | 0.21572  |
| H | -20.97533 | -4.55031 | 0.40913  |
| H | -21.45894 | -2.93666 | 0.99031  |
| H | -21.39172 | -3.25111 | -0.73839 |
| C | -15.78675 | -3.48019 | 0.45883  |
| H | -15.27127 | -2.95857 | 1.27231  |
| H | -15.77762 | -4.55144 | 0.68297  |
| H | -15.19027 | -3.31732 | -0.44517 |
| C | -21.0741  | 2.23026  | -0.96578 |
| H | -21.61461 | 1.97932  | -0.0468  |
| H | -21.20961 | 3.29296  | -1.18138 |
| H | -21.52771 | 1.64116  | -1.7702  |
| C | -15.55244 | -0.41473 | -0.15774 |
| C | -14.78057 | -0.63339 | -1.30792 |
| C | -14.89607 | -0.13485 | 1.04934  |
| C | -13.39094 | -0.57009 | -1.25489 |
| C | -13.50646 | -0.07213 | 1.10612  |
| H | -15.48043 | 0.03634  | 1.94949  |
| H | -12.80799 | -0.73994 | -2.15502 |
| H | -13.01425 | 0.14714  | 2.04894  |
| C | -12.71843 | -0.28521 | -0.04616 |
| H | -15.27434 | -0.85218 | -2.25101 |
| C | 19.41936  | -3.05364 | -0.8139  |
| C | 17.14698  | -3.00341 | -0.75293 |
| C | 17.67431  | -1.69688 | -0.48107 |
| C | 17.04509  | -0.47211 | -0.20008 |
| C | 17.80004  | 0.68841  | 0.04233  |
| C | 17.41085  | 2.03736  | 0.33953  |
| C | 19.67808  | 1.87841  | 0.2725   |
| N | 19.07258  | -1.78133 | -0.52894 |
| N | 19.20052  | 0.64396  | 0.01099  |
| B | 20.06497  | -0.61149 | -0.28621 |
| F | 20.8894   | -0.89851 | 0.80703  |
| F | 20.84654  | -0.39884 | -1.42642 |
| C | 15.71976  | -3.46276 | -0.81813 |
| H | 15.18452  | -3.28181 | 0.12011  |
| H | 15.1564   | -2.94855 | -1.60413 |
| H | 15.6874   | -4.53692 | -1.02572 |
| C | 21.13921  | 2.18954  | 0.318    |
| H | 21.29746  | 3.24636  | 0.54655  |
| H | 21.64114  | 1.57996  | 1.07712  |
| H | 21.61473  | 1.9553   | -0.64053 |
| C | 16.03818  | 2.62683  | 0.48303  |
| H | 15.47634  | 2.16929  | 1.30444  |
| H | 16.11725  | 3.69995  | 0.68318  |
| H | 15.43533  | 2.49252  | -0.42127 |
| C | 20.8409   | -3.49603 | -0.94304 |

|   |           |          |          |
|---|-----------|----------|----------|
| H | 21.3961   | -3.28544 | -0.02284 |
| H | 20.88994  | -4.56713 | -1.15402 |
| H | 21.34452  | -2.94982 | -1.74814 |
| C | 15.55326  | -0.40078 | -0.15946 |
| C | 14.81751  | -0.14609 | -1.32577 |
| C | 14.86064  | -0.58417 | 1.0459   |
| C | 13.42785  | -0.0733  | -1.28886 |
| C | 13.4708   | -0.51475 | 1.0858   |
| H | 15.41683  | -0.78219 | 1.95832  |
| H | 12.87332  | 0.12678  | -2.20066 |
| H | 12.95     | -0.6597  | 2.02762  |
| C | 12.71889  | -0.25552 | -0.08112 |
| H | 15.3398   | -0.00217 | -2.26789 |
| C | 18.25002  | -3.82686 | -0.95661 |
| H | 18.22692  | -4.88466 | -1.18586 |
| C | 18.59469  | 2.75534  | 0.47886  |
| H | 18.68148  | 3.81027  | 0.70613  |
| C | -18.32273 | -3.82803 | 0.40823  |
| H | -18.32294 | -4.88843 | 0.62634  |
| C | -18.51996 | 2.77543  | -0.95541 |
| H | -18.58315 | 3.8333   | -1.1767  |
